# Supplementary material for: Effect of MSCs and MSC-Derived Extracellular Vesicles on Human Blood Coagulation
Source: Cells. 2019 Mar 19;8(3):258. doi: 10.3390/cells8030258 (PMC6468445; doi:10.3390/cells8030258)
Supplement: Supplementary file 1 [file cells-08-00258-s001.zip]

Archive with 4 entries (4 files):
- Supplemental files/SUPPLEMENTAL FIGURES.pdf
- Supplemental files/Tables S2 and S3.xlsx
- Supplemental files/Video S1.mp4
- Supplemental files/Video S2.mp4
