# Supplementary material for: Effect of MSCs and MSC-Derived Extracellular Vesicles on Human Blood Coagulation
Source: Cells. 2019 Mar 19;8(3):258. doi: 10.3390/cells8030258 (PMC6468445; doi:10.3390/cells8030258)
Supplement: Supplementary file 1 [file cells-08-00258-s001.zip › Supplemental files/Tables S2 and S3.xlsx]

## Sheet: Table S2 - proteins
Samples 1-3 - MSCs, 4-6 - EVs				Area						#Peptides	#Unique	#Spec						PTMs	Avg. Mass	Description
Protein Group	Protein ID	Accession	Gene name	Sample 1	Sample 2	Sample 3	Sample 4	Sample 5	Sample 6			Sample 1	Sample 2	Sample 3	Sample 4	Sample 5	Sample 6
6	3	P21333	FLNA	0	0	0	3430000	3410000	4190000	72	70	2	2	3	127	139	126	Deamidation (NQ); Carbamidomethylation	280737	Filamin-A OS=Homo sapiens GN=FLNA PE=1 SV=4
1	15	P60709	ACTB	11000000	8040000	10600000	83500000	68700000	99300000	33	11	72	68	93	197	181	334	Deamidation (NQ); Oxidation (M); Carbamidomethylation	41737	Actin cytoplasmic 1 OS=Homo sapiens GN=ACTB PE=1 SV=1
1	16	P63261	ACTG	11000000	8040000	10600000	83500000	68700000	99300000	33	11	72	68	93	197	181	334	Deamidation (NQ); Oxidation (M); Carbamidomethylation	41793	Actin cytoplasmic 2 OS=Homo sapiens GN=ACTG1 PE=1 SV=1
2	8	P08670	VIME				81500000	37200000	58600000	55	46	0	0	0	358	203	339	Deamidation (NQ); Carbamidomethylation	53652	Vimentin OS=Homo sapiens GN=VIM PE=1 SV=4
24	1	P14618	KPYM	0	0	27600	7980000	1760000	3920000	28	28	2	1	4	66	31	48	Carbamidomethylation	57937	Pyruvate kinase PKM OS=Homo sapiens GN=PKM PE=1 SV=4
39	39	P07996	TSP1	143000	277000	2020000			45500	26	26	19	16	73	0	0	12	Carbamidomethylation	129383	Thrombospondin-1 OS=Homo sapiens GN=THBS1 PE=1 SV=2
8	17	Q05682-4	CALD1				65800	91800	76700	38	2	0	0	0	70	97	87	Oxidation (M)	62663	Isoform 4 of Caldesmon OS=Homo sapiens GN=CALD1
8	18	Q05682-5	CALD1				65800	91800	76700	38	2	0	0	0	70	97	87	Oxidation (M)	61213	Isoform 5 of Caldesmon OS=Homo sapiens GN=CALD1
4	48	P68032	ACTC		369000	481000	7620000	8500000	11100000	25	8	39	39	46	84	89	94	Deamidation (NQ); Oxidation (M); Carbamidomethylation	42019	Actin alpha cardiac muscle 1 OS=Homo sapiens GN=ACTC1 PE=1 SV=1
11	11	Q71U36	TBA1A						0	21	1	13	10	30	63	59	63	Deamidation (NQ); Carbamidomethylation	50136	Tubulin alpha-1A chain OS=Homo sapiens GN=TUBA1A PE=1 SV=1
7	13	P04406	G3P	479000	194000	208000	27100000	15000000	23200000	24	23	14	7	8	103	76	95	Deamidation (NQ); Carbamidomethylation	36053	Glyceraldehyde-3-phosphate dehydrogenase OS=Homo sapiens GN=GAPDH PE=1 SV=3
15	9	P07437	TBB5	140000	164000		1350000	1510000	1960000	24	6	16	13	12	60	55	59	Deamidation (NQ); Carbamidomethylation	49671	Tubulin beta chain OS=Homo sapiens GN=TUBB PE=1 SV=2
35	22	P06733	ENOA	38800	0	2280	3610000	1320000	2610000	21	21	3	2	1	53	33	50	Carbamidomethylation	47169	Alpha-enolase OS=Homo sapiens GN=ENO1 PE=1 SV=2
22	34	P68366-2	TBA4A			0				18	3	12	9	33	45	46	51	Deamidation (NQ); Carbamidomethylation	48329	Isoform 2 of Tubulin alpha-4A chain OS=Homo sapiens GN=TUBA4A
22	35	P68366	TBA4A			0				18	3	12	9	33	45	46	51	Deamidation (NQ); Carbamidomethylation	49924	Tubulin alpha-4A chain OS=Homo sapiens GN=TUBA4A PE=1 SV=1
32	12	P11021	GRP78				1500000	1080000	1390000	23	21	0	0	0	44	41	43		72333	78 kDa glucose-regulated protein OS=Homo sapiens GN=HSPA5 PE=1 SV=2
37	32	O43707	ACTN4				162000	253000	159000	28	16	0	0	0	46	51	48	Carbamidomethylation	104854	Alpha-actinin-4 OS=Homo sapiens GN=ACTN4 PE=1 SV=2
5	117	Q6S8J3	POTEE			42400				12	1	11	13	24	80	72	190	Deamidation (NQ); Carbamidomethylation	121363	POTE ankyrin domain family member E OS=Homo sapiens GN=POTEE PE=2 SV=3
23	36	P68371	TBB4B				36000	7170		19	1	15	12	12	51	47	47	Deamidation (NQ); Carbamidomethylation	49831	Tubulin beta-4B chain OS=Homo sapiens GN=TUBB4B PE=1 SV=1
28	24	P11142	HSP7C	109000			2210000	705000	1250000	25	21	1	0	1	62	36	48	Deamidation (NQ); Carbamidomethylation	70898	Heat shock cognate 71 kDa protein OS=Homo sapiens GN=HSPA8 PE=1 SV=1
16	41	P68104	EF1A1	353000	158000	82900	14600000	8380000	13700000	19	19	6	3	6	55	45	52	Deamidation (NQ); Carbamidomethylation	50141	Elongation factor 1-alpha 1 OS=Homo sapiens GN=EEF1A1 PE=1 SV=1
33	27	P12814-3	ACTN1				344000	558000	490000	24	12	0	0	0	42	53	57	Deamidation (NQ); Carbamidomethylation	105568	Isoform 3 of Alpha-actinin-1 OS=Homo sapiens GN=ACTN1
33	28	P12814-2	ACTN1				344000	558000	490000	24	12	0	0	0	42	53	57	Deamidation (NQ); Carbamidomethylation	102709	Isoform 2 of Alpha-actinin-1 OS=Homo sapiens GN=ACTN1
33	29	P12814	ACTN1				344000	558000	490000	24	12	0	0	0	42	53	57	Deamidation (NQ); Carbamidomethylation	103058	Alpha-actinin-1 OS=Homo sapiens GN=ACTN1 PE=1 SV=2
33	30	P12814-4	ACTN1				344000	558000	490000	24	12	0	0	0	42	53	57	Deamidation (NQ); Carbamidomethylation	107141	Isoform 4 of Alpha-actinin-1 OS=Homo sapiens GN=ACTN1
29	58	P07355	ANXA2			21400	3000000	1140000	2380000	17	6	4	2	3	50	43	54	Carbamidomethylation	38604	Annexin A2 OS=Homo sapiens GN=ANXA2 PE=1 SV=2
29	59	P07355-2	ANXA2			21400	3000000	1140000	2380000	17	6	4	2	3	50	43	54	Carbamidomethylation	40411	Isoform 2 of Annexin A2 OS=Homo sapiens GN=ANXA2
62	62	P04075	ALDOA				851000	405000	875000	17	15	0	0	0	28	13	22	Deamidation (NQ); Carbamidomethylation	39420	Fructose-bisphosphate aldolase A OS=Homo sapiens GN=ALDOA PE=1 SV=2
62	63	P04075-2	ALDOA				851000	405000	875000	17	15	0	0	0	28	13	22	Deamidation (NQ); Carbamidomethylation	45261	Isoform 2 of Fructose-bisphosphate aldolase A OS=Homo sapiens GN=ALDOA
13	50	P07951-2	TPM2				439000	413000	241000	25	10	0	0	0	55	73	56	Carbamidomethylation	32990	Isoform 2 of Tropomyosin beta chain OS=Homo sapiens GN=TPM2
12	61	P67936	TPM4				225000	294000	248000	22	5	0	0	0	46	63	56	Carbamidomethylation	28522	Tropomyosin alpha-4 chain OS=Homo sapiens GN=TPM4 PE=1 SV=3
20	47	P09493-3	TPM1				0	24600		22	1	0	0	0	45	67	50		32876	Isoform 3 of Tropomyosin alpha-1 chain OS=Homo sapiens GN=TPM1
27	40	P27797	CALR				5280000	3160000	2350000	21	21	0	0	0	73	51	41	Carbamidomethylation	48142	Calreticulin OS=Homo sapiens GN=CALR PE=1 SV=1
52	127	P01024	CO3	13900000	9100000	307000				10	10	30	28	9	0	0	0	Deamidation (NQ); Carbamidomethylation	187147	Complement C3 OS=Homo sapiens GN=C3 PE=1 SV=2
59	37	P08238	HS90B				192000	39400	44700	17	10	0	0	0	29	21	24	Carbamidomethylation	83264	Heat shock protein HSP 90-beta OS=Homo sapiens GN=HSP90AB1 PE=1 SV=4
70	76	P21589	5NTD	5520	863000	286000		52200	115000	14	14	4	23	20	0	9	7	Carbamidomethylation	63368	5'-nucleotidase OS=Homo sapiens GN=NT5E PE=1 SV=1
63	38	P13639	EF2				579000	361000	883000	19	19	0	0	0	24	21	22	Carbamidomethylation	95338	Elongation factor 2 OS=Homo sapiens GN=EEF2 PE=1 SV=4
38	44	P07237	PDIA1		0	2060	1500000	1080000	1520000	16	16	0	1	3	34	31	32	Carbamidomethylation	57116	Protein disulfide-isomerase OS=Homo sapiens GN=P4HB PE=1 SV=3
73	71	P21980	TGM2				172000	421000	1380000	14	14	0	0	0	14	21	28	Carbamidomethylation	77329	Protein-glutamine gamma-glutamyltransferase 2 OS=Homo sapiens GN=TGM2 PE=1 SV=2
54	94	P06396-2	GELS	2360000	981000	35400	0		0	14	14	38	26	4	2	0	1	Deamidation (NQ); Carbamidomethylation	80641	Isoform 2 of Gelsolin OS=Homo sapiens GN=GSN
54	95	P06396-4	GELS	2360000	981000	35400	0		0	14	14	38	26	4	2	0	1	Deamidation (NQ); Carbamidomethylation	81485	Isoform 4 of Gelsolin OS=Homo sapiens GN=GSN
54	96	P06396-3	GELS	2360000	981000	35400	0		0	14	14	38	26	4	2	0	1	Deamidation (NQ); Carbamidomethylation	81941	Isoform 3 of Gelsolin OS=Homo sapiens GN=GSN
54	97	P06396	GELS	2360000	981000	35400	0		0	14	14	38	26	4	2	0	1	Deamidation (NQ); Carbamidomethylation	85697	Gelsolin OS=Homo sapiens GN=GSN PE=1 SV=1
36	69	Q01995	TAGL				6280000	3570000	2330000	19	18	0	0	0	56	48	37	Carbamidomethylation	22611	Transgelin OS=Homo sapiens GN=TAGLN PE=1 SV=4
34	84	P23528	COF1	3490			5700000	2720000	3520000	15	14	3	0	0	39	31	33	Carbamidomethylation	18502	Cofilin-1 OS=Homo sapiens GN=CFL1 PE=1 SV=3
60	85	P22626-2	ROA2				776000	518000	749000	12	10	0	0	0	28	20	25		36006	Isoform A2 of Heterogeneous nuclear ribonucleoproteins A2/B1 OS=Homo sapiens GN=HNRNPA2B1
60	86	P22626	ROA2				776000	518000	749000	12	10	0	0	0	28	20	25		37430	Heterogeneous nuclear ribonucleoproteins A2/B1 OS=Homo sapiens GN=HNRNPA2B1 PE=1 SV=2
45	111	P62937	PPIA	0	25900	0	4070000	2100000	5020000	10	9	2	1	1	31	27	30	Deamidation (NQ); Carbamidomethylation	18012	Peptidyl-prolyl cis-trans isomerase A OS=Homo sapiens GN=PPIA PE=1 SV=2
69	81	P18206-2	VINC		0		83900	356000	607000	10	10	0	1	0	12	21	19		116722	Isoform 1 of Vinculin OS=Homo sapiens GN=VCL
69	82	P18206	VINC		0		83900	356000	607000	10	10	0	1	0	12	21	19		123799	Vinculin OS=Homo sapiens GN=VCL PE=1 SV=4
46	188	P09382	LEG1	37300	36800	43700	7260000	6750000	6150000	8	8	3	3	3	38	33	34	Carbamidomethylation	14716	Galectin-1 OS=Homo sapiens GN=LGALS1 PE=1 SV=2
56	57	P14625	ENPL				692000	356000	407000	15	14	0	0	0	22	28	20	Deamidation (NQ); Carbamidomethylation	92469	Endoplasmin OS=Homo sapiens GN=HSP90B1 PE=1 SV=1
66	78	P06576	ATPB				929000	188000	375000	11	11	0	0	0	24	19	22		56560	ATP synthase subunit beta mitochondrial OS=Homo sapiens GN=ATP5B PE=1 SV=3
94	103	Q07065	CKAP4				8360	141000	233000	9	9	0	0	0	8	20	18		66023	Cytoskeleton-associated protein 4 OS=Homo sapiens GN=CKAP4 PE=1 SV=2
53	75	Q9Y490	TLN1	16700	23200	6370	175000	65700	163000	13	13	6	7	6	25	20	14	Deamidation (NQ); Carbamidomethylation	269765	Talin-1 OS=Homo sapiens GN=TLN1 PE=1 SV=3
26	88	P06753-2	TPM3				4260	8540	5580	15	1	0	0	0	36	48	43	Carbamidomethylation	29033	Isoform 2 of Tropomyosin alpha-3 chain OS=Homo sapiens GN=TPM3
17	191	Q562R1	ACTBL				63500	63200	73500	7	1	16	14	22	32	32	37	Oxidation (M); Carbamidomethylation	42003	Beta-actin-like protein 2 OS=Homo sapiens GN=ACTBL2 PE=1 SV=2
77	107	P37802	TAGL2				1160000	260000	464000	11	10	0	0	0	31	15	12	Carbamidomethylation	22391	Transgelin-2 OS=Homo sapiens GN=TAGLN2 PE=1 SV=3
77	108	P37802-2	TAGL2				1160000	260000	464000	11	10	0	0	0	31	15	12	Carbamidomethylation	24454	Isoform 2 of Transgelin-2 OS=Homo sapiens GN=TAGLN2
64	124	P07737	PROF1				3030000	2800000	2270000	11	11	0	0	0	20	23	24	Deamidation (NQ); Carbamidomethylation	15054	Profilin-1 OS=Homo sapiens GN=PFN1 PE=1 SV=2
146	106	P02545	LMNA				22000	67900	183000	9	9	0	0	0	2	6	14	Carbamidomethylation	74140	Prelamin-A/C OS=Homo sapiens GN=LMNA PE=1 SV=1
146	109	P02545-2	LMNA				22000	67900	183000	9	9	0	0	0	2	6	14	Carbamidomethylation	65135	Isoform C of Prelamin-A/C OS=Homo sapiens GN=LMNA
146	110	P02545-6	LMNA				22000	67900	183000	9	9	0	0	0	2	6	14	Carbamidomethylation	69249	Isoform 6 of Prelamin-A/C OS=Homo sapiens GN=LMNA
79	113	P60174-1	TPIS				1060000	662000	692000	9	9	0	0	0	19	19	18	Carbamidomethylation	26669	Isoform 2 of Triosephosphate isomerase OS=Homo sapiens GN=TPI1
79	114	P60174	TPIS				1060000	662000	692000	9	9	0	0	0	19	19	18	Carbamidomethylation	30791	Triosephosphate isomerase OS=Homo sapiens GN=TPI1 PE=1 SV=3
82	211	P06748	NPM				286000	155000	84500	6	6	0	0	0	18	12	12	Deamidation (NQ)	32575	Nucleophosmin OS=Homo sapiens GN=NPM1 PE=1 SV=2
90	156	P00338	LDHA				204000	44800	342000	7	6	0	0	0	18	10	19	Deamidation (NQ); Carbamidomethylation	36689	L-lactate dehydrogenase A chain OS=Homo sapiens GN=LDHA PE=1 SV=2
90	157	P00338-3	LDHA				204000	44800	342000	7	6	0	0	0	18	10	19	Deamidation (NQ); Carbamidomethylation	39837	Isoform 3 of L-lactate dehydrogenase A chain OS=Homo sapiens GN=LDHA
86	120	P50454	SERPH				214000	444000	379000	9	9	0	0	0	9	26	14		46441	Serpin H1 OS=Homo sapiens GN=SERPINH1 PE=1 SV=2
89	122	P07195	LDHB				172000	108000	196000	8	7	0	0	0	13	15	16	Carbamidomethylation	36639	L-lactate dehydrogenase B chain OS=Homo sapiens GN=LDHB PE=1 SV=2
105	145	P09651-3	ROA1				25900	0	316000	9	7	0	0	0	13	9	12	Carbamidomethylation	29386	Isoform 2 of Heterogeneous nuclear ribonucleoprotein A1 OS=Homo sapiens GN=HNRNPA1
105	146	P09651-2	ROA1				25900	0	316000	9	7	0	0	0	13	9	12	Carbamidomethylation	34196	Isoform A1-A of Heterogeneous nuclear ribonucleoprotein A1 OS=Homo sapiens GN=HNRNPA1
105	147	P09651	ROA1				25900	0	316000	9	7	0	0	0	13	9	12	Carbamidomethylation	38747	Heterogeneous nuclear ribonucleoprotein A1 OS=Homo sapiens GN=HNRNPA1 PE=1 SV=5
57	87	P30101	PDIA3	7980	20600	2810	808000	432000	407000	9	9	2	4	1	27	18	23	Carbamidomethylation	56782	Protein disulfide-isomerase A3 OS=Homo sapiens GN=PDIA3 PE=1 SV=4
99	160	P19105	ML12A				524000	267000	169000	8	8	0	0	0	15	11	9		19794	Myosin regulatory light chain 12A OS=Homo sapiens GN=MYL12A PE=1 SV=2
99	161	O14950	ML12B				524000	267000	169000	8	8	0	0	0	15	11	9		19779	Myosin regulatory light chain 12B OS=Homo sapiens GN=MYL12B PE=1 SV=2
81	92	P07900	HS90A				0		3370	9	3	0	0	0	20	15	16	Carbamidomethylation	84660	Heat shock protein HSP 90-alpha OS=Homo sapiens GN=HSP90AA1 PE=1 SV=5
81	93	P07900-2	HS90A				0		3370	9	3	0	0	0	20	15	16	Carbamidomethylation	98161	Isoform 2 of Heat shock protein HSP 90-alpha OS=Homo sapiens GN=HSP90AA1
71	99	P63104	1433Z	26900		0	218000	175000	277000	12	9	5	0	1	21	10	21	Carbamidomethylation	27745	14-3-3 protein zeta/delta OS=Homo sapiens GN=YWHAZ PE=1 SV=1
50	129	P60660	MYL6		33000		3980000	3040000	3810000	7	7	0	2	0	32	31	30	Carbamidomethylation	16930	Myosin light polypeptide 6 OS=Homo sapiens GN=MYL6 PE=1 SV=2
50	148	P60660-2	MYL6		33000		3980000	3040000	3810000	7	7	0	2	0	32	31	30	Carbamidomethylation	16961	Isoform Smooth muscle of Myosin light polypeptide 6 OS=Homo sapiens GN=MYL6
120	121	P04083	ANXA1				697000	547000	752000	9	9	0	0	0	13	7	12		38714	Annexin A1 OS=Homo sapiens GN=ANXA1 PE=1 SV=2
40	281	P69905	HBA	40400000	26200000	17300000				5	5	34	28	32	0	0	0	Oxidation (M)	15258	Hemoglobin subunit alpha OS=Homo sapiens GN=HBA1 PE=1 SV=2
31	132	Q99877	H2B1N	44600	941000	20600	4660000	4390000	8270000	7	7	3	18	8	21	21	32		13922	Histone H2B type 1-N OS=Homo sapiens GN=HIST1H2BN PE=1 SV=3
31	133	Q93079	H2B1H	44600	941000	20600	4660000	4390000	8270000	7	7	3	18	8	21	21	32		13892	Histone H2B type 1-H OS=Homo sapiens GN=HIST1H2BH PE=1 SV=3
31	134	P62807	H2B1C	44600	941000	20600	4660000	4390000	8270000	7	7	3	18	8	21	21	32		13906	Histone H2B type 1-C/E/F/G/I OS=Homo sapiens GN=HIST1H2BC PE=1 SV=4
31	135	O60814	H2B1K	44600	941000	20600	4660000	4390000	8270000	7	7	3	18	8	21	21	32		13890	Histone H2B type 1-K OS=Homo sapiens GN=HIST1H2BK PE=1 SV=3
31	136	Q5QNW6	H2B2F	44600	941000	20600	4660000	4390000	8270000	7	7	3	18	8	21	21	32		13920	Histone H2B type 2-F OS=Homo sapiens GN=HIST2H2BF PE=1 SV=3
31	137	P58876	H2B1D	44600	941000	20600	4660000	4390000	8270000	7	7	3	18	8	21	21	32		13936	Histone H2B type 1-D OS=Homo sapiens GN=HIST1H2BD PE=1 SV=2
31	138	Q5QNW6-2	H2B2F	44600	941000	20600	4660000	4390000	8270000	7	7	3	18	8	21	21	32		14841	Isoform 2 of Histone H2B type 2-F OS=Homo sapiens GN=HIST2H2BF
84	270	P31949	S10AB			0	1600000	687000	1180000	5	5	0	0	2	18	19	16	Deamidation (NQ); Carbamidomethylation	11740	Protein S100-A11 OS=Homo sapiens GN=S100A11 PE=1 SV=2
125	130	P61978	HNRPK				129000	121000	221000	6	6	0	0	0	11	4	7	Carbamidomethylation	50976	Heterogeneous nuclear ribonucleoprotein K OS=Homo sapiens GN=HNRNPK PE=1 SV=1
125	131	P61978-2	HNRPK				129000	121000	221000	6	6	0	0	0	11	4	7	Carbamidomethylation	51028	Isoform 2 of Heterogeneous nuclear ribonucleoprotein K OS=Homo sapiens GN=HNRNPK
143	125	Q00610-2	CLH1				18800	9910	74300	8	8	0	0	0	7	3	10	Deamidation (NQ); Carbamidomethylation	187889	Isoform 2 of Clathrin heavy chain 1 OS=Homo sapiens GN=CLTC
143	126	Q00610	CLH1				18800	9910	74300	8	8	0	0	0	7	3	10	Deamidation (NQ); Carbamidomethylation	191613	Clathrin heavy chain 1 OS=Homo sapiens GN=CLTC PE=1 SV=5
51	155	Q3ZCM7	TBB8				485000	249000	263000	8	1	9	6	4	21	21	22	Oxidation (HW); Carbamidomethylation	49776	Tubulin beta-8 chain OS=Homo sapiens GN=TUBB8 PE=1 SV=2
51	158	A6NNZ2	TBB8L				485000	249000	263000	8	1	9	6	4	21	21	22	Oxidation (HW); Carbamidomethylation	49573	Tubulin beta-8 chain-like protein LOC260334 OS=Homo sapiens PE=1 SV=1
102	168	P16070-18	CD44	21500	7790	3310	410000	25700	57700	7	7	5	4	4	14	7	5	Carbamidomethylation	37278	Isoform 18 of CD44 antigen OS=Homo sapiens GN=CD44
102	169	P16070-12	CD44	21500	7790	3310	410000	25700	57700	7	7	5	4	4	14	7	5	Carbamidomethylation	39416	Isoform 12 of CD44 antigen OS=Homo sapiens GN=CD44
102	170	P16070-14	CD44	21500	7790	3310	410000	25700	57700	7	7	5	4	4	14	7	5	Carbamidomethylation	43169	Isoform 14 of CD44 antigen OS=Homo sapiens GN=CD44
102	171	P16070-13	CD44	21500	7790	3310	410000	25700	57700	7	7	5	4	4	14	7	5	Carbamidomethylation	46261	Isoform 13 of CD44 antigen OS=Homo sapiens GN=CD44
102	172	P16070-11	CD44	21500	7790	3310	410000	25700	57700	7	7	5	4	4	14	7	5	Carbamidomethylation	46565	Isoform 11 of CD44 antigen OS=Homo sapiens GN=CD44
102	173	P16070-8	CD44	21500	7790	3310	410000	25700	57700	7	7	5	4	4	14	7	5	Carbamidomethylation	74388	Isoform 8 of CD44 antigen OS=Homo sapiens GN=CD44
102	174	P16070-4	CD44	21500	7790	3310	410000	25700	57700	7	7	5	4	4	14	7	5	Carbamidomethylation	76612	Isoform 4 of CD44 antigen OS=Homo sapiens GN=CD44
102	175	P16070-3	CD44	21500	7790	3310	410000	25700	57700	7	7	5	4	4	14	7	5	Carbamidomethylation	77983	Isoform 3 of CD44 antigen OS=Homo sapiens GN=CD44
102	176	P16070-7	CD44	21500	7790	3310	410000	25700	57700	7	7	5	4	4	14	7	5	Carbamidomethylation	78446	Isoform 7 of CD44 antigen OS=Homo sapiens GN=CD44
102	177	P16070-10	CD44	21500	7790	3310	410000	25700	57700	7	7	5	4	4	14	7	5	Carbamidomethylation	53411	Isoform 10 of CD44 antigen OS=Homo sapiens GN=CD44
102	178	P16070-5	CD44	21500	7790	3310	410000	25700	57700	7	7	5	4	4	14	7	5	Carbamidomethylation	80790	Isoform 5 of CD44 antigen OS=Homo sapiens GN=CD44
102	179	P16070	CD44	21500	7790	3310	410000	25700	57700	7	7	5	4	4	14	7	5	Carbamidomethylation	81538	CD44 antigen OS=Homo sapiens GN=CD44 PE=1 SV=3
102	181	P16070-16	CD44	21500	7790	3310	410000	25700	57700	7	7	5	4	4	14	7	5	Carbamidomethylation	73150	Isoform 16 of CD44 antigen OS=Homo sapiens GN=CD44
102	182	P16070-17	CD44	21500	7790	3310	410000	25700	57700	7	7	5	4	4	14	7	5	Carbamidomethylation	75957	Isoform 17 of CD44 antigen OS=Homo sapiens GN=CD44
102	183	P16070-6	CD44	21500	7790	3310	410000	25700	57700	7	7	5	4	4	14	7	5	Carbamidomethylation	76705	Isoform 6 of CD44 antigen OS=Homo sapiens GN=CD44
83	144	P08758	ANXA5			0	571000	375000	518000	8	8	0	0	2	18	14	14	Deamidation (NQ)	35937	Annexin A5 OS=Homo sapiens GN=ANXA5 PE=1 SV=2
21	143	P01023	A2MG	6610000	5170000	8950000				10	6	34	23	44	0	0	0	Deamidation (NQ)	163290	Alpha-2-macroglobulin OS=Homo sapiens GN=A2M PE=1 SV=3
41	237	P02768	ALBU	26700000	20600000	11300000				7	7	22	20	23	0	0	0	Carbamidomethylation	69367	Serum albumin OS=Homo sapiens GN=ALB PE=1 SV=2
112	391	P04004	VTNC	2750000	1790000	1240000				5	4	12	10	12	0	0	0		54306	Vitronectin OS=Homo sapiens GN=VTN PE=1 SV=1
134	248	P55072	TERA				256000	169000	221000	5	5	0	0	0	7	8	11	Carbamidomethylation	89322	Transitional endoplasmic reticulum ATPase OS=Homo sapiens GN=VCP PE=1 SV=4
76	215	Q9H4B7	TBB1	547000	180000	314000				6	3	9	6	11	8	6	6		50327	Tubulin beta-1 chain OS=Homo sapiens GN=TUBB1 PE=1 SV=1
126	316	P35754	GLRX1				2030000	282000	1070000	6	6	0	0	0	17	5	6	Deamidation (NQ); Carbamidomethylation	11776	Glutaredoxin-1 OS=Homo sapiens GN=GLRX PE=1 SV=2
55	315	P62805	H4	0	309000	24500	2490000	2420000	3990000	7	7	2	7	3	24	23	28		11367	Histone H4 OS=Homo sapiens GN=HIST1H4A PE=1 SV=2
65	204	Q9BUF5	TBB6				68200		0	7	1	3	0	1	21	19	19	Deamidation (NQ); Carbamidomethylation	49857	Tubulin beta-6 chain OS=Homo sapiens GN=TUBB6 PE=1 SV=1
108	299	Q01518	CAP1				354000	142000	216000	3	3	0	0	0	10	15	14	Carbamidomethylation	51902	Adenylyl cyclase-associated protein 1 OS=Homo sapiens GN=CAP1 PE=1 SV=5
161	196	P00558	PGK1				17600	5350	51200	7	7	0	0	0	3	5	10	Carbamidomethylation	44615	Phosphoglycerate kinase 1 OS=Homo sapiens GN=PGK1 PE=1 SV=3
161	197	P00558-2	PGK1				17600	5350	51200	7	7	0	0	0	3	5	10	Carbamidomethylation	41429	Isoform 2 of Phosphoglycerate kinase 1 OS=Homo sapiens GN=PGK1
61	263	Q99878	H2A1J				35300	228000	231000	7	2	3	6	3	19	17	19		13936	Histone H2A type 1-J OS=Homo sapiens GN=HIST1H2AJ PE=1 SV=3
61	264	Q96KK5	H2A1H				35300	228000	231000	7	2	3	6	3	19	17	19		13906	Histone H2A type 1-H OS=Homo sapiens GN=HIST1H2AH PE=1 SV=3
61	265	Q16777	H2A2C				35300	228000	231000	7	2	3	6	3	19	17	19		13988	Histone H2A type 2-C OS=Homo sapiens GN=HIST2H2AC PE=1 SV=4
61	266	Q9BTM1	H2AJ				35300	228000	231000	7	2	3	6	3	19	17	19		14019	Histone H2A.J OS=Homo sapiens GN=H2AFJ PE=1 SV=1
61	267	P0C0S8	H2A1				35300	228000	231000	7	2	3	6	3	19	17	19		14091	Histone H2A type 1 OS=Homo sapiens GN=HIST1H2AG PE=1 SV=2
61	268	Q6FI13	H2A2A				35300	228000	231000	7	2	3	6	3	19	17	19		14095	Histone H2A type 2-A OS=Homo sapiens GN=HIST2H2AA3 PE=1 SV=3
93	311	P63241	IF5A1				253000	16100	37800	5	5	0	0	0	20	14	11	Carbamidomethylation	16832	Eukaryotic translation initiation factor 5A-1 OS=Homo sapiens GN=EIF5A PE=1 SV=2
93	313	P63241-2	IF5A1				253000	16100	37800	5	5	0	0	0	20	14	11	Carbamidomethylation	20170	Isoform 2 of Eukaryotic translation initiation factor 5A-1 OS=Homo sapiens GN=EIF5A
167	244	P22314-2	UBA1				0	0	40500	5	5	0	0	0	5	5	7		113800	Isoform 2 of Ubiquitin-like modifier-activating enzyme 1 OS=Homo sapiens GN=UBA1
167	245	P22314	UBA1				0	0	40500	5	5	0	0	0	5	5	7		117849	Ubiquitin-like modifier-activating enzyme 1 OS=Homo sapiens GN=UBA1 PE=1 SV=3
259	272	Q6NZI2	CAVN1				34800	0		4	4	0	0	0	6	3	0		43476	Caveolae-associated protein 1 OS=Homo sapiens GN=CAVIN1 PE=1 SV=1
144	406	P00734	THRB	739000	611000	985000				4	4	8	5	11	0	0	0	Oxidation (M); Carbamidomethylation	70037	Prothrombin OS=Homo sapiens GN=F2 PE=1 SV=2
117	190	Q15942	ZYX				391000	110000	91000	6	6	0	0	0	13	9	8		61277	Zyxin OS=Homo sapiens GN=ZYX PE=1 SV=1
115	239	P19823	ITIH2	522000	515000	405000				6	6	12	10	10	0	0	0		106463	Inter-alpha-trypsin inhibitor heavy chain H2 OS=Homo sapiens GN=ITIH2 PE=1 SV=2
58	323	Q96QV6	H2A1A				22700	40500	126000	6	1	3	6	3	18	20	19		14233	Histone H2A type 1-A OS=Homo sapiens GN=HIST1H2AA PE=1 SV=3
72	489	P62328	TYB4				272000	1430000	973000	7	7	0	0	0	7	26	16		5053	Thymosin beta-4 OS=Homo sapiens GN=TMSB4X PE=1 SV=2
116	218	Q15084-3	PDIA6				247000	288000	312000	6	6	0	0	0	12	13	11		47838	Isoform 3 of Protein disulfide-isomerase A6 OS=Homo sapiens GN=PDIA6
116	219	Q15084-4	PDIA6				247000	288000	312000	6	6	0	0	0	12	13	11		48646	Isoform 4 of Protein disulfide-isomerase A6 OS=Homo sapiens GN=PDIA6
116	220	Q15084	PDIA6				247000	288000	312000	6	6	0	0	0	12	13	11		48121	Protein disulfide-isomerase A6 OS=Homo sapiens GN=PDIA6 PE=1 SV=1
116	221	Q15084-5	PDIA6				247000	288000	312000	6	6	0	0	0	12	13	11		53261	Isoform 5 of Protein disulfide-isomerase A6 OS=Homo sapiens GN=PDIA6
116	222	Q15084-2	PDIA6				247000	288000	312000	6	6	0	0	0	12	13	11		53901	Isoform 2 of Protein disulfide-isomerase A6 OS=Homo sapiens GN=PDIA6
67	242	P20742	PZP	1250000	830000	2080000				5	1	14	12	19	0	0	0	Deamidation (NQ); Carbamidomethylation	163862	Pregnancy zone protein OS=Homo sapiens GN=PZP PE=1 SV=4
91	209	P27348	1433T	0			189000	73600	118000	7	3	3	0	0	17	13	9	Carbamidomethylation	27764	14-3-3 protein theta OS=Homo sapiens GN=YWHAQ PE=1 SV=1
98	233	O43852	CALU				152000	83200	55400	7	7	0	0	0	19	13	8		37107	Calumenin OS=Homo sapiens GN=CALU PE=1 SV=2
98	234	O43852-3	CALU				152000	83200	55400	7	7	0	0	0	19	13	8		38051	Isoform 3 of Calumenin OS=Homo sapiens GN=CALU
175	236	P80723	BASP1			0		23000	36800	6	6	0	0	2	0	2	11		22693	Brain acid soluble protein 1 OS=Homo sapiens GN=BASP1 PE=1 SV=2
113	149	O75369-2	FLNB				0	0	0	8	6	0	0	1	9	7	10	Carbamidomethylation	275666	Isoform 2 of Filamin-B OS=Homo sapiens GN=FLNB
113	150	O75369-9	FLNB				0	0	0	8	6	0	0	1	9	7	10	Carbamidomethylation	276936	Isoform 9 of Filamin-B OS=Homo sapiens GN=FLNB
113	151	O75369	FLNB				0	0	0	8	6	0	0	1	9	7	10	Carbamidomethylation	278162	Filamin-B OS=Homo sapiens GN=FLNB PE=1 SV=2
113	152	O75369-8	FLNB				0	0	0	8	6	0	0	1	9	7	10	Carbamidomethylation	281633	Isoform 8 of Filamin-B OS=Homo sapiens GN=FLNB
113	153	O75369-6	FLNB				0	0	0	8	6	0	0	1	9	7	10	Carbamidomethylation	271411	Isoform 6 of Filamin-B OS=Homo sapiens GN=FLNB
113	154	O75369-3	FLNB				0	0	0	8	6	0	0	1	9	7	10	Carbamidomethylation	273906	Isoform 3 of Filamin-B OS=Homo sapiens GN=FLNB
137	243	P23284	PPIB				147000	278000	373000	6	6	0	0	0	5	8	10	Carbamidomethylation	23743	Peptidyl-prolyl cis-trans isomerase B OS=Homo sapiens GN=PPIB PE=1 SV=2
193	314	P07858	CATB				0	55900	43800	5	5	0	0	0	4	4	5	Carbamidomethylation	37822	Cathepsin B OS=Homo sapiens GN=CTSB PE=1 SV=3
118	256	P10809	CH60				326000	79700	238000	6	6	0	0	0	15	8	6		61055	60 kDa heat shock protein mitochondrial OS=Homo sapiens GN=HSPD1 PE=1 SV=2
121	225	P05556-2	ITB1	0	75100	43900	9310	2840	8330	6	6	3	5	6	7	3	4	Carbamidomethylation	87446	Isoform 2 of Integrin beta-1 OS=Homo sapiens GN=ITGB1
121	226	P05556	ITB1	0	75100	43900	9310	2840	8330	6	6	3	5	6	7	3	4	Carbamidomethylation	88415	Integrin beta-1 OS=Homo sapiens GN=ITGB1 PE=1 SV=2
121	227	P05556-5	ITB1	0	75100	43900	9310	2840	8330	6	6	3	5	6	7	3	4	Carbamidomethylation	88884	Isoform 5 of Integrin beta-1 OS=Homo sapiens GN=ITGB1
121	228	P05556-4	ITB1	0	75100	43900	9310	2840	8330	6	6	3	5	6	7	3	4	Carbamidomethylation	91035	Isoform 4 of Integrin beta-1 OS=Homo sapiens GN=ITGB1
121	229	P05556-3	ITB1	0	75100	43900	9310	2840	8330	6	6	3	5	6	7	3	4	Carbamidomethylation	91620	Isoform 3 of Integrin beta-1 OS=Homo sapiens GN=ITGB1
42	230	P68431	H31	0	301000	0	935000	1320000	3050000	5	1	5	9	4	15	21	21	Deamidation (NQ); Oxidation (M); Carbamidomethylation	15404	Histone H3.1 OS=Homo sapiens GN=HIST1H3A PE=1 SV=2
49	247	P84243	H33		32600	0	258000	442000	610000	5	1	1	7	5	12	18	21	Carbamidomethylation	15328	Histone H3.3 OS=Homo sapiens GN=H3F3A PE=1 SV=2
43	231	Q71DI3	H32	0	17300	14600	716000	738000	1180000	5	1	2	10	6	17	16	23	Deamidation (NQ); Oxidation (M); Carbamidomethylation	15388	Histone H3.2 OS=Homo sapiens GN=HIST2H3A PE=1 SV=3
132	300	P67809	YBOX1				117000	16100	32100	5	5	0	0	0	11	8	5		35924	Nuclease-sensitive element-binding protein 1 OS=Homo sapiens GN=YBX1 PE=1 SV=3
372	453	P35527	K1C9			0				2	2	0	0	4	0	0	0		62064	Keratin type I cytoskeletal 9 OS=Homo sapiens GN=KRT9 PE=1 SV=3
96	167	P61981	1433G				16300	3490	12100	7	4	1	0	0	15	10	10	Carbamidomethylation	28303	14-3-3 protein gamma OS=Homo sapiens GN=YWHAG PE=1 SV=2
109	451	P06454-2	PTMA				370000	239000	266000	4	4	0	0	0	13	11	12		12074	Isoform 2 of Prothymosin alpha OS=Homo sapiens GN=PTMA
109	452	P06454	PTMA				370000	239000	266000	4	4	0	0	0	13	11	12		12203	Prothymosin alpha OS=Homo sapiens GN=PTMA PE=1 SV=2
203	309	P22392	NDKB				38900	60400	82100	4	4	0	0	0	2	6	6		17298	Nucleoside diphosphate kinase B OS=Homo sapiens GN=NME2 PE=1 SV=1
203	310	P22392-2	NDKB				38900	60400	82100	4	4	0	0	0	2	6	6		30137	Isoform 3 of Nucleoside diphosphate kinase B OS=Homo sapiens GN=NME2
97	216	P31946-2	1433B				80300	4800	21600	6	2	1	0	0	14	8	10		27850	Isoform Short of 14-3-3 protein beta/alpha OS=Homo sapiens GN=YWHAB
97	217	P31946	1433B				80300	4800	21600	6	2	1	0	0	14	8	10		28082	14-3-3 protein beta/alpha OS=Homo sapiens GN=YWHAB PE=1 SV=3
249	341	Q99439	CNN2				18700	13600	30300	3	3	0	0	0	2	2	4	Carbamidomethylation	33697	Calponin-2 OS=Homo sapiens GN=CNN2 PE=1 SV=4
78	352	P02765	FETUA	6960000	6220000	4920000	0			5	5	18	16	18	2	0	0	Carbamidomethylation	39325	Alpha-2-HS-glycoprotein OS=Homo sapiens GN=AHSG PE=1 SV=1
250	365	P29401	TKT				0	0	6970	3	3	0	0	0	3	1	5		67878	Transketolase OS=Homo sapiens GN=TKT PE=1 SV=3
250	366	P29401-2	TKT				0	0	6970	3	3	0	0	0	3	1	5		68814	Isoform 2 of Transketolase OS=Homo sapiens GN=TKT
209	328	P31943	HNRH1				0	11500	0	3	2	0	0	0	3	4	5	Carbamidomethylation	49229	Heterogeneous nuclear ribonucleoprotein H OS=Homo sapiens GN=HNRNPH1 PE=1 SV=4
207	278	P05387	RLA2				128000	67500	0	5	5	0	0	0	4	3	1		11665	60S acidic ribosomal protein P2 OS=Homo sapiens GN=RPLP2 PE=1 SV=1
208	303	P60842	IF4A1				17400	0	0	4	3	0	0	0	4	2	7		46154	Eukaryotic initiation factor 4A-I OS=Homo sapiens GN=EIF4A1 PE=1 SV=1
131	470	Q02383	SEMG2	8080	0	2400		2350		3	2	10	8	7	1	3	0	Carbamidomethylation	65445	Semenogelin-2 OS=Homo sapiens GN=SEMG2 PE=1 SV=1
160	260	P04792	HSPB1				296000	216000	125000	5	5	0	0	0	9	5	6		22783	Heat shock protein beta-1 OS=Homo sapiens GN=HSPB1 PE=1 SV=2
182	210	Q09666	AHNK				101000	0		6	6	0	0	0	7	1	0		629114	Neuroblast differentiation-associated protein AHNAK OS=Homo sapiens GN=AHNAK PE=1 SV=2
100	223	P18669	PGAM1				174000	160000	332000	5	5	0	0	0	9	8	16	Carbamidomethylation	28804	Phosphoglycerate mutase 1 OS=Homo sapiens GN=PGAM1 PE=1 SV=2
153	347	P09211	GSTP1				54600	481000	501000	3	3	0	0	0	3	9	9		23356	Glutathione S-transferase P OS=Homo sapiens GN=GSTP1 PE=1 SV=2
180	128	P26038	MOES			0	0	0	86900	7	7	0	0	1	4	1	2	Carbamidomethylation	67820	Moesin OS=Homo sapiens GN=MSN PE=1 SV=3
110	249	P0DMV9	HS71B	1460						5	1	1	0	1	8	7	10		70052	Heat shock 70 kDa protein 1B OS=Homo sapiens GN=HSPA1B PE=1 SV=1
110	250	P0DMV8	HS71A	1460						5	1	1	0	1	8	7	10		70052	Heat shock 70 kDa protein 1A OS=Homo sapiens GN=HSPA1A PE=1 SV=1
101	252	P36955	PEDF	876000	406000					6	6	19	11	0	0	0	0		46312	Pigment epithelium-derived factor OS=Homo sapiens GN=SERPINF1 PE=1 SV=4
282	372	P62841	RS15				0	12600	2910	3	3	0	0	0	3	1	5		17040	40S ribosomal protein S15 OS=Homo sapiens GN=RPS15 PE=1 SV=2
162	214	Q06830	PRDX1				54200	0		6	4	0	0	0	10	4	1	Carbamidomethylation	22110	Peroxiredoxin-1 OS=Homo sapiens GN=PRDX1 PE=1 SV=1
273	405	P40926	MDHM				0	42700	181000	2	2	0	0	0	2	2	4		35503	Malate dehydrogenase mitochondrial OS=Homo sapiens GN=MDH2 PE=1 SV=3
273	407	P40926-2	MDHM				0	42700	181000	2	2	0	0	0	2	2	4		30875	Isoform 2 of Malate dehydrogenase mitochondrial OS=Homo sapiens GN=MDH2
302	377	P30050	RL12				42600	0	23200	3	3	0	0	0	3	3	2	Carbamidomethylation	17819	60S ribosomal protein L12 OS=Homo sapiens GN=RPL12 PE=1 SV=1
85	238	P16949	STMN1				210000	73200	93900	6	6	0	0	0	20	10	13		17302	Stathmin OS=Homo sapiens GN=STMN1 PE=1 SV=3
173	411	O00299	CLIC1				104000	52900	95900	2	2	0	0	0	5	3	5		26923	Chloride intracellular channel protein 1 OS=Homo sapiens GN=CLIC1 PE=1 SV=4
194	385	P13987	CD59	111000	129000	988000			18100	3	3	3	5	5	0	0	1	Carbamidomethylation	14177	CD59 glycoprotein OS=Homo sapiens GN=CD59 PE=1 SV=1
95	295	P10412	H14				13500		28600	4	2	0	0	0	13	6	10		21865	Histone H1.4 OS=Homo sapiens GN=HIST1H1E PE=1 SV=2
95	296	P16402	H13				13500		28600	4	2	0	0	0	13	6	10		22350	Histone H1.3 OS=Homo sapiens GN=HIST1H1D PE=1 SV=2
222	488	P60033	CD81	980000	429000	632000		0		2	2	3	3	5	0	2	0	Deamidation (NQ); Carbamidomethylation	25809	CD81 antigen OS=Homo sapiens GN=CD81 PE=1 SV=1
188	398	P60981-2	DEST				9750		0	3	2	0	0	0	4	0	1	Carbamidomethylation	16621	Isoform 2 of Destrin OS=Homo sapiens GN=DSTN
188	399	P60981	DEST				9750		0	3	2	0	0	0	4	0	1	Carbamidomethylation	18506	Destrin OS=Homo sapiens GN=DSTN PE=1 SV=3
205	297	P21291	CSRP1				26100	4730		3	3	0	0	0	10	2	0	Carbamidomethylation	20567	Cysteine and glycine-rich protein 1 OS=Homo sapiens GN=CSRP1 PE=1 SV=3
114	371	P00441	SODC				83400	64800	100000	3	3	0	0	0	14	9	11	Carbamidomethylation	15936	Superoxide dismutase [Cu-Zn] OS=Homo sapiens GN=SOD1 PE=1 SV=2
80	437	P04114	APOB			107000				2	2	0	0	3	0	0	0		515611	Apolipoprotein B-100 OS=Homo sapiens GN=APOB PE=1 SV=2
183	282	Q15149-7	PLEC				7270	0		3	3	0	0	0	4	1	0		512609	Isoform 7 of Plectin OS=Homo sapiens GN=PLEC
183	283	Q15149-8	PLEC				7270	0		3	3	0	0	0	4	1	0		513712	Isoform 8 of Plectin OS=Homo sapiens GN=PLEC
183	284	Q15149-9	PLEC				7270	0		3	3	0	0	0	4	1	0		514780	Isoform 9 of Plectin OS=Homo sapiens GN=PLEC
183	285	Q15149-4	PLEC				7270	0		3	3	0	0	0	4	1	0		516204	Isoform 4 of Plectin OS=Homo sapiens GN=PLEC
183	286	Q15149-5	PLEC				7270	0		3	3	0	0	0	4	1	0		516282	Isoform 5 of Plectin OS=Homo sapiens GN=PLEC
183	287	Q15149-6	PLEC				7270	0		3	3	0	0	0	4	1	0		516484	Isoform 6 of Plectin OS=Homo sapiens GN=PLEC
183	288	Q15149-3	PLEC				7270	0		3	3	0	0	0	4	1	0		518037	Isoform 3 of Plectin OS=Homo sapiens GN=PLEC
183	289	Q15149-2	PLEC				7270	0		3	3	0	0	0	4	1	0		518478	Isoform 2 of Plectin OS=Homo sapiens GN=PLEC
183	290	Q15149	PLEC				7270	0		3	3	0	0	0	4	1	0		531796	Plectin OS=Homo sapiens GN=PLEC PE=1 SV=3
191	554	P51884	LUM	597000	427000					3	3	8	6	0	0	0	0	Carbamidomethylation	38429	Lumican OS=Homo sapiens GN=LUM PE=1 SV=2
260	317	O60664-4	PLIN3				89200	0	14400	4	4	0	0	0	6	2	2	Deamidation (NQ)	45804	Isoform 4 of Perilipin-3 OS=Homo sapiens GN=PLIN3
260	318	O60664-3	PLIN3				89200	0	14400	4	4	0	0	0	6	2	2	Deamidation (NQ)	46947	Isoform 3 of Perilipin-3 OS=Homo sapiens GN=PLIN3
260	319	O60664	PLIN3				89200	0	14400	4	4	0	0	0	6	2	2	Deamidation (NQ)	47075	Perilipin-3 OS=Homo sapiens GN=PLIN3 PE=1 SV=3
220	279	P27824	CALX				5350	0	0	3	3	0	0	0	5	1	2		67568	Calnexin OS=Homo sapiens GN=CANX PE=1 SV=2
220	280	P27824-2	CALX				5350	0	0	3	3	0	0	0	5	1	2		71503	Isoform 2 of Calnexin OS=Homo sapiens GN=CANX
142	338	P07910-4	HNRPC				65500	15100	9680	3	3	0	0	0	8	4	2		27821	Isoform 4 of Heterogeneous nuclear ribonucleoproteins C1/C2 OS=Homo sapiens GN=HNRNPC
142	339	P07910-2	HNRPC				65500	15100	9680	3	3	0	0	0	8	4	2		32338	Isoform C1 of Heterogeneous nuclear ribonucleoproteins C1/C2 OS=Homo sapiens GN=HNRNPC
142	340	P07910	HNRPC				65500	15100	9680	3	3	0	0	0	8	4	2		33670	Heterogeneous nuclear ribonucleoproteins C1/C2 OS=Homo sapiens GN=HNRNPC PE=1 SV=4
299	465	P07339	CATD				0	18300	358000	2	2	0	0	0	1	3	4	Carbamidomethylation	44552	Cathepsin D OS=Homo sapiens GN=CTSD PE=1 SV=1
166	460	P12259	FA5	25800		118000				2	2	1	0	5	0	0	0	Carbamidomethylation	251701	Coagulation factor V OS=Homo sapiens GN=F5 PE=1 SV=4
401	487	P52597	HNRPF						0	2	1	0	0	0	0	2	2	Carbamidomethylation	45672	Heterogeneous nuclear ribonucleoprotein F OS=Homo sapiens GN=HNRNPF PE=1 SV=3
107	326	P62258	1433E	17300		0	26100	0	40300	4	2	3	0	3	10	3	8	Carbamidomethylation	29174	14-3-3 protein epsilon OS=Homo sapiens GN=YWHAE PE=1 SV=1
158	455	P04279-2	SEMG1	8710						2	1	7	7	4	1	2	0		45322	Isoform 2 of Semenogelin-1 OS=Homo sapiens GN=SEMG1
158	456	P04279	SEMG1	8710						2	1	7	7	4	1	2	0		52131	Semenogelin-1 OS=Homo sapiens GN=SEMG1 PE=1 SV=2
181	335	Q9H299	SH3L3				47500	0	0	4	4	0	0	0	6	5	3	Carbamidomethylation	10438	SH3 domain-binding glutamic acid-rich-like protein 3 OS=Homo sapiens GN=SH3BGRL3 PE=1 SV=1
128	389	P68871	HBB	418000	161000	335000				3	2	10	10	9	0	0	0		15998	Hemoglobin subunit beta OS=Homo sapiens GN=HBB PE=1 SV=2
405	321	P63244	RACK1				44700		0	4	4	0	0	0	2	0	2	Carbamidomethylation	35077	Receptor of activated protein C kinase 1 OS=Homo sapiens GN=RACK1 PE=1 SV=3
347	386	P46777	RL5				0		0	3	3	0	0	0	1	0	4	Carbamidomethylation	34363	60S ribosomal protein L5 OS=Homo sapiens GN=RPL5 PE=1 SV=3
319	436	P24534	EF1B				170000	0		2	2	0	0	0	4	1	0	Carbamidomethylation	24764	Elongation factor 1-beta OS=Homo sapiens GN=EEF1B2 PE=1 SV=3
438	474	P43490	NAMPT					0	0	2	2	0	0	0	0	1	1		55521	Nicotinamide phosphoribosyltransferase OS=Homo sapiens GN=NAMPT PE=1 SV=1
383	421	P84098	RL19				0	0	0	2	2	0	0	0	1	1	2		23466	60S ribosomal protein L19 OS=Homo sapiens GN=RPL19 PE=1 SV=1
262	484	P05388-2	RLA0				6110		8100	2	2	0	0	0	4	0	5	Carbamidomethylation	27436	Isoform 2 of 60S acidic ribosomal protein P0 OS=Homo sapiens GN=RPLP0
262	485	P05388	RLA0				6110		8100	2	2	0	0	0	4	0	5	Carbamidomethylation	34274	60S acidic ribosomal protein P0 OS=Homo sapiens GN=RPLP0 PE=1 SV=1
262	486	Q8NHW5	RLA0L				6110		8100	2	2	0	0	0	4	0	5	Carbamidomethylation	34364	60S acidic ribosomal protein P0-like OS=Homo sapiens GN=RPLP0P6 PE=5 SV=1
358	348	P02452	CO1A1					0		3	3	0	0	0	0	4	0	Carbamidomethylation	138942	Collagen alpha-1(I) chain OS=Homo sapiens GN=COL1A1 PE=1 SV=5
92	408	P21926	CD9	375000	43800	219000	30900	0	111000	3	3	13	4	11	1	2	2	Carbamidomethylation	25416	CD9 antigen OS=Homo sapiens GN=CD9 PE=1 SV=4
147	433	P40227-2	TCPZ				65700	13100	38500	2	2	0	0	0	6	6	6		53289	Isoform 2 of T-complex protein 1 subunit zeta OS=Homo sapiens GN=CCT6A
147	435	P40227	TCPZ				65700	13100	38500	2	2	0	0	0	6	6	6		58024	T-complex protein 1 subunit zeta OS=Homo sapiens GN=CCT6A PE=1 SV=3
384	491	P06744	G6PI				0		41800	2	2	0	0	0	1	0	4		63147	Glucose-6-phosphate isomerase OS=Homo sapiens GN=GPI PE=1 SV=4
217	526	Q8NC51-4	PAIRB				123000	75000	96400	2	2	0	0	0	4	5	4		42427	Isoform 4 of Plasminogen activator inhibitor 1 RNA-binding protein OS=Homo sapiens GN=SERBP1
217	527	Q8NC51-3	PAIRB				123000	75000	96400	2	2	0	0	0	4	5	4		43135	Isoform 3 of Plasminogen activator inhibitor 1 RNA-binding protein OS=Homo sapiens GN=SERBP1
217	528	Q8NC51-2	PAIRB				123000	75000	96400	2	2	0	0	0	4	5	4		44257	Isoform 2 of Plasminogen activator inhibitor 1 RNA-binding protein OS=Homo sapiens GN=SERBP1
217	529	Q8NC51	PAIRB				123000	75000	96400	2	2	0	0	0	4	5	4		44965	Plasminogen activator inhibitor 1 RNA-binding protein OS=Homo sapiens GN=SERBP1 PE=1 SV=2
122	384	P17096	HMGA1				20600	110000	304000	4	4	0	0	0	3	12	8		11676	High mobility group protein HMG-I/HMG-Y OS=Homo sapiens GN=HMGA1 PE=1 SV=3
239	301	Q14847-2	LASP1				14600	0	0	3	3	0	0	0	3	1	3	Carbamidomethylation	36014	Isoform 2 of LIM and SH3 domain protein 1 OS=Homo sapiens GN=LASP1
239	302	Q14847	LASP1				14600	0	0	3	3	0	0	0	3	1	3	Carbamidomethylation	29717	LIM and SH3 domain protein 1 OS=Homo sapiens GN=LASP1 PE=1 SV=2
226	367	Q00839-2	HNRPU				130000	7970	156000	3	3	0	0	0	2	6	3	Carbamidomethylation	88980	Isoform 2 of Heterogeneous nuclear ribonucleoprotein U OS=Homo sapiens GN=HNRNPU
226	368	Q00839	HNRPU				130000	7970	156000	3	3	0	0	0	2	6	3	Carbamidomethylation	90585	Heterogeneous nuclear ribonucleoprotein U OS=Homo sapiens GN=HNRNPU PE=1 SV=6
154	394	P52565	GDIR1				68200	170000	76600	3	3	0	0	0	6	4	6	Deamidation (NQ); Carbamidomethylation	23207	Rho GDP-dissociation inhibitor 1 OS=Homo sapiens GN=ARHGDIA PE=1 SV=3
221	392	P61916-2	NPC2					225000	41700	3	3	0	0	0	0	6	6	Carbamidomethylation	13416	Isoform 2 of Epididymal secretory protein E1 OS=Homo sapiens GN=NPC2
221	393	P61916	NPC2					225000	41700	3	3	0	0	0	0	6	6	Carbamidomethylation	16570	Epididymal secretory protein E1 OS=Homo sapiens GN=NPC2 PE=1 SV=1
119	251	Q04917	1433F				0	0	11500	5	2	1	0	0	8	6	8	Carbamidomethylation	28219	14-3-3 protein eta OS=Homo sapiens GN=YWHAH PE=1 SV=4
261	387	P26373	RL13				16300		2180	3	3	0	0	0	6	0	2		24261	60S ribosomal protein L13 OS=Homo sapiens GN=RPL13 PE=1 SV=4
213	333	P62753	RS6				66600	28500	55700	4	4	0	0	0	5	4	5	Carbamidomethylation	28681	40S ribosomal protein S6 OS=Homo sapiens GN=RPS6 PE=1 SV=1
251	395	P09972	ALDOC						0	3	1	0	0	0	2	1	3	Carbamidomethylation	39456	Fructose-bisphosphate aldolase C OS=Homo sapiens GN=ALDOC PE=1 SV=2
187	464	O14556	G3PT	280000	266000	62400				2	1	2	3	3	3	2	3	Carbamidomethylation	44501	Glyceraldehyde-3-phosphate dehydrogenase testis-specific OS=Homo sapiens GN=GAPDHS PE=1 SV=2
283	515	P35268	RL22				0	10300	0	2	2	0	0	0	3	3	3	Carbamidomethylation	14787	60S ribosomal protein L22 OS=Homo sapiens GN=RPL22 PE=1 SV=2
214	441	O00629	IMA3						0	1	1	0	0	0	0	0	2		57887	Importin subunit alpha-3 OS=Homo sapiens GN=KPNA4 PE=1 SV=1
263	493	Q14019	COTL1				0	28500	0	2	2	0	0	0	1	4	4	Carbamidomethylation	15945	Coactosin-like protein OS=Homo sapiens GN=COTL1 PE=1 SV=3
232	690	O00303	EIF3F				23300	12700	50500	1	1	0	0	0	3	6	3		37564	Eukaryotic translation initiation factor 3 subunit F OS=Homo sapiens GN=EIF3F PE=1 SV=1
255	459	P07602	SAP				205000	196000	253000	2	2	0	0	0	3	4	3	Carbamidomethylation	58113	Prosaposin OS=Homo sapiens GN=PSAP PE=1 SV=2
255	531	P07602-2	SAP				205000	196000	253000	2	2	0	0	0	3	4	3	Carbamidomethylation	58356	Isoform Sap-mu-6 of Prosaposin OS=Homo sapiens GN=PSAP
255	532	P07602-3	SAP				205000	196000	253000	2	2	0	0	0	3	4	3	Carbamidomethylation	58484	Isoform Sap-mu-9 of Prosaposin OS=Homo sapiens GN=PSAP
171	412	P29966	MARCS		2310	11400	14300	27400	27000	2	2	0	1	2	3	5	6		31555	Myristoylated alanine-rich C-kinase substrate OS=Homo sapiens GN=MARCKS PE=1 SV=4
327	492	P39023	RL3				0	0	0	2	2	0	0	0	4	1	1	Carbamidomethylation	46109	60S ribosomal protein L3 OS=Homo sapiens GN=RPL3 PE=1 SV=2
170	277	P06703	S10A6				25200	1940	36900	4	4	0	0	0	4	4	6		10180	Protein S100-A6 OS=Homo sapiens GN=S100A6 PE=1 SV=1
192	676	Q12797-7	ASPH				26800	11200	27900	1	1	0	0	0	5	5	6	Deamidation (NQ)	21963	Isoform 7 of Aspartyl/asparaginyl beta-hydroxylase OS=Homo sapiens GN=ASPH
192	691	Q12797-6	ASPH				26800	11200	27900	1	1	0	0	0	5	5	6	Deamidation (NQ)	29757	Isoform 6 of Aspartyl/asparaginyl beta-hydroxylase OS=Homo sapiens GN=ASPH
192	692	Q12797-2	ASPH				26800	11200	27900	1	1	0	0	0	5	5	6	Deamidation (NQ)	34646	Isoform 2 of Aspartyl/asparaginyl beta-hydroxylase OS=Homo sapiens GN=ASPH
192	693	Q12797	ASPH				26800	11200	27900	1	1	0	0	0	5	5	6	Deamidation (NQ)	85863	Aspartyl/asparaginyl beta-hydroxylase OS=Homo sapiens GN=ASPH PE=1 SV=3
106	450	P20962	PTMS				196000	140000	204000	2	2	0	0	0	12	11	12		11530	Parathymosin OS=Homo sapiens GN=PTMS PE=1 SV=2
408	560	P0DP23	CALM1				0			1	1	0	0	0	2	0	0		16838	Calmodulin-1 OS=Homo sapiens GN=CALM1 PE=1 SV=1
408	561	P0DP25	CALM3				0			1	1	0	0	0	2	0	0		16838	Calmodulin-3 OS=Homo sapiens GN=CALM3 PE=1 SV=1
408	562	P0DP24	CALM2				0			1	1	0	0	0	2	0	0		16838	Calmodulin-2 OS=Homo sapiens GN=CALM2 PE=1 SV=1
201	472	P61247	RS3A				13400	4980	22900	2	2	0	0	0	3	4	8		29945	40S ribosomal protein S3a OS=Homo sapiens GN=RPS3A PE=1 SV=2
271	572	P47914	RL29				68000	16900	51500	1	1	0	0	0	3	1	3		17752	60S ribosomal protein L29 OS=Homo sapiens GN=RPL29 PE=1 SV=2
309	431	P02788-2	TRFL		266	38900				2	2	0	1	3	0	0	0	Carbamidomethylation	73161	Isoform DeltaLf of Lactotransferrin OS=Homo sapiens GN=LTF
309	432	P02788	TRFL		266	38900				2	2	0	1	3	0	0	0	Carbamidomethylation	78182	Lactotransferrin OS=Homo sapiens GN=LTF PE=1 SV=6
169	396	P14314-2	GLU2B				18400	17400	13000	2	2	0	0	0	4	5	4	Carbamidomethylation	59178	Isoform 2 of Glucosidase 2 subunit beta OS=Homo sapiens GN=PRKCSH
169	397	P14314	GLU2B				18400	17400	13000	2	2	0	0	0	4	5	4	Carbamidomethylation	59426	Glucosidase 2 subunit beta OS=Homo sapiens GN=PRKCSH PE=1 SV=2
164	683	Q15233-2	NONO				50200	6890	29700	1	1	0	0	0	6	8	5		43866	Isoform 2 of Non-POU domain-containing octamer-binding protein OS=Homo sapiens GN=NONO
164	684	Q15233	NONO				50200	6890	29700	1	1	0	0	0	6	8	5		54232	Non-POU domain-containing octamer-binding protein OS=Homo sapiens GN=NONO PE=1 SV=4
104	354	P16401	H15						0	3	1	0	0	0	10	6	10		22580	Histone H1.5 OS=Homo sapiens GN=HIST1H1B PE=1 SV=3
204	413	P10599-2	THIO				214000	0	396000	2	2	0	0	0	4	2	7	Carbamidomethylation	9452	Isoform 2 of Thioredoxin OS=Homo sapiens GN=TXN
204	414	P10599	THIO				214000	0	396000	2	2	0	0	0	4	2	7	Carbamidomethylation	11737	Thioredoxin OS=Homo sapiens GN=TXN PE=1 SV=3
378	471	P08865	RSSA				14800		0	2	2	0	0	0	2	0	2		32854	40S ribosomal protein SA OS=Homo sapiens GN=RPSA PE=1 SV=4
343	546	P38919	IF4A3						0	2	1	0	0	0	0	0	4		46871	Eukaryotic initiation factor 4A-III OS=Homo sapiens GN=EIF4A3 PE=1 SV=4
392	555	Q08211	DHX9					0	0	1	1	0	0	0	0	1	2		140958	ATP-dependent RNA helicase A OS=Homo sapiens GN=DHX9 PE=1 SV=4
392	570	Q08211-2	DHX9					0	0	1	1	0	0	0	0	1	2		24336	Isoform 2 of ATP-dependent RNA helicase A OS=Homo sapiens GN=DHX9
332	494	Q01105-3	SET				0		0	2	2	0	0	0	4	0	3	Deamidation (NQ)	30993	Isoform 3 of Protein SET OS=Homo sapiens GN=SET
332	495	Q01105-4	SET				0		0	2	2	0	0	0	4	0	3	Deamidation (NQ)	31272	Isoform 4 of Protein SET OS=Homo sapiens GN=SET
332	496	Q01105-2	SET				0		0	2	2	0	0	0	4	0	3	Deamidation (NQ)	32103	Isoform 2 of Protein SET OS=Homo sapiens GN=SET
332	497	Q01105	SET				0		0	2	2	0	0	0	4	0	3	Deamidation (NQ)	33489	Protein SET OS=Homo sapiens GN=SET PE=1 SV=3
385	501	Q16881-5	TRXR1				0	4010	0	2	2	0	0	0	2	1	2	Deamidation (NQ)	54754	Isoform 5 of Thioredoxin reductase 1 cytoplasmic OS=Homo sapiens GN=TXNRD1
385	502	Q16881-2	TRXR1				0	4010	0	2	2	0	0	0	2	1	2	Deamidation (NQ)	59787	Isoform 2 of Thioredoxin reductase 1 cytoplasmic OS=Homo sapiens GN=TXNRD1
385	503	Q16881-4	TRXR1				0	4010	0	2	2	0	0	0	2	1	2	Deamidation (NQ)	60419	Isoform 4 of Thioredoxin reductase 1 cytoplasmic OS=Homo sapiens GN=TXNRD1
385	504	Q16881-3	TRXR1				0	4010	0	2	2	0	0	0	2	1	2	Deamidation (NQ)	65567	Isoform 3 of Thioredoxin reductase 1 cytoplasmic OS=Homo sapiens GN=TXNRD1
385	505	Q16881-6	TRXR1				0	4010	0	2	2	0	0	0	2	1	2	Deamidation (NQ)	67266	Isoform 6 of Thioredoxin reductase 1 cytoplasmic OS=Homo sapiens GN=TXNRD1
385	506	Q16881	TRXR1				0	4010	0	2	2	0	0	0	2	1	2	Deamidation (NQ)	70906	Thioredoxin reductase 1 cytoplasmic OS=Homo sapiens GN=TXNRD1 PE=1 SV=3
496	600	P02679-2	FIBG	0						1	1	1	0	0	0	0	0	Carbamidomethylation	49497	Isoform Gamma-A of Fibrinogen gamma chain OS=Homo sapiens GN=FGG
496	602	P02679	FIBG	0						1	1	1	0	0	0	0	0	Carbamidomethylation	51512	Fibrinogen gamma chain OS=Homo sapiens GN=FGG PE=1 SV=3
326	466	P62917	RL8				34200			2	2	0	0	0	3	0	0	Carbamidomethylation	28025	60S ribosomal protein L8 OS=Homo sapiens GN=RPL8 PE=1 SV=2
195	498	P61158	ARP3				6170	0	26500	2	2	0	0	0	4	4	7	Deamidation (NQ); Carbamidomethylation	47371	Actin-related protein 3 OS=Homo sapiens GN=ACTR3 PE=1 SV=3
242	473	Q00325-2	MPCP				33700	0	42700	2	2	0	0	0	3	2	4	Carbamidomethylation	39959	Isoform B of Phosphate carrier protein mitochondrial OS=Homo sapiens GN=SLC25A3
138	771	P63313	TYB10					14100	0	1	1	0	0	0	0	2	2		5026	Thymosin beta-10 OS=Homo sapiens GN=TMSB10 PE=1 SV=2
387	726	P02656	APOC3		0	94700				1	1	0	2	3	0	0	0		10852	Apolipoprotein C-III OS=Homo sapiens GN=APOC3 PE=1 SV=1
189	439	P02649	APOE	50100	91800	63300				2	2	3	6	5	0	0	0		36154	Apolipoprotein E OS=Homo sapiens GN=APOE PE=1 SV=1
451	702	Q99497	PARK7					6490	3270	1	1	0	0	0	0	2	1		19891	Protein/nucleic acid deglycase DJ-1 OS=Homo sapiens GN=PARK7 PE=1 SV=2
497	696	Q13409-6	DC1I2				0	0		1	1	0	0	0	1	1	0		68298	Isoform 2F of Cytoplasmic dynein 1 intermediate chain 2 OS=Homo sapiens GN=DYNC1I2
497	697	Q13409-3	DC1I2				0	0		1	1	0	0	0	1	1	0		68426	Isoform 2C of Cytoplasmic dynein 1 intermediate chain 2 OS=Homo sapiens GN=DYNC1I2
497	698	Q13409-7	DC1I2				0	0		1	1	0	0	0	1	1	0		70485	Isoform 3 of Cytoplasmic dynein 1 intermediate chain 2 OS=Homo sapiens GN=DYNC1I2
497	699	Q13409-2	DC1I2				0	0		1	1	0	0	0	1	1	0		70645	Isoform 2B of Cytoplasmic dynein 1 intermediate chain 2 OS=Homo sapiens GN=DYNC1I2
497	700	Q13409-5	DC1I2				0	0		1	1	0	0	0	1	1	0		71328	Isoform 2E of Cytoplasmic dynein 1 intermediate chain 2 OS=Homo sapiens GN=DYNC1I2
497	701	Q13409	DC1I2				0	0		1	1	0	0	0	1	1	0		71457	Cytoplasmic dynein 1 intermediate chain 2 OS=Homo sapiens GN=DYNC1I2 PE=1 SV=3
300	475	P50914	RL14				0		47000	2	2	0	0	0	3	0	4	Carbamidomethylation	23432	60S ribosomal protein L14 OS=Homo sapiens GN=RPL14 PE=1 SV=4
333	694	O14773-2	TPP1				0	10100	0	1	1	0	0	0	3	2	2		34464	Isoform 2 of Tripeptidyl-peptidase 1 OS=Homo sapiens GN=TPP1
333	695	O14773	TPP1				0	10100	0	1	1	0	0	0	3	2	2		61248	Tripeptidyl-peptidase 1 OS=Homo sapiens GN=TPP1 PE=1 SV=2
254	438	P19338	NUCL				4840	0	8260	2	2	0	0	0	3	1	5		76615	Nucleolin OS=Homo sapiens GN=NCL PE=1 SV=3
310	537	P62241	RS8				0	0	75300	2	2	0	0	0	2	1	3		24205	40S ribosomal protein S8 OS=Homo sapiens GN=RPS8 PE=1 SV=2
285	703	P50213-2	IDH3A				716	0	4890	1	1	0	0	0	5	1	3	Deamidation (NQ)	31381	Isoform 2 of Isocitrate dehydrogenase [NAD] subunit alpha mitochondrial OS=Homo sapiens GN=IDH3A
285	704	P50213	IDH3A				716	0	4890	1	1	0	0	0	5	1	3	Deamidation (NQ)	39592	Isocitrate dehydrogenase [NAD] subunit alpha mitochondrial OS=Homo sapiens GN=IDH3A PE=1 SV=1
410	716	Q16630-3	CPSF6					0	1970	1	1	0	0	0	0	2	2		52326	Isoform 3 of Cleavage and polyadenylation specificity factor subunit 6 OS=Homo sapiens GN=CPSF6
410	717	Q16630	CPSF6					0	1970	1	1	0	0	0	0	2	2		59210	Cleavage and polyadenylation specificity factor subunit 6 OS=Homo sapiens GN=CPSF6 PE=1 SV=2
410	718	Q16630-2	CPSF6					0	1970	1	1	0	0	0	0	2	2		63471	Isoform 2 of Cleavage and polyadenylation specificity factor subunit 6 OS=Homo sapiens GN=CPSF6
241	442	P62987	RL40				93800	80400	34700	2	2	0	0	0	4	3	2		14728	Ubiquitin-60S ribosomal protein L40 OS=Homo sapiens GN=UBA52 PE=1 SV=2
241	523	P62979	RS27A				93800	80400	34700	2	2	0	0	0	4	3	2		17965	Ubiquitin-40S ribosomal protein S27a OS=Homo sapiens GN=RPS27A PE=1 SV=2
241	524	P0CG47	UBB				93800	80400	34700	2	2	0	0	0	4	3	2		25762	Polyubiquitin-B OS=Homo sapiens GN=UBB PE=1 SV=1
241	525	P0CG48	UBC				93800	80400	34700	2	2	0	0	0	4	3	2		77039	Polyubiquitin-C OS=Homo sapiens GN=UBC PE=1 SV=3
199	609	Q96A33	CCD47				2340	0	3440	1	1	0	0	0	4	2	6		55874	Coiled-coil domain-containing protein 47 OS=Homo sapiens GN=CCDC47 PE=1 SV=1
256	547	Q9NQC3-2	RTN4				0	0	24200	2	2	0	0	0	2	1	5		40318	Isoform 2 of Reticulon-4 OS=Homo sapiens GN=RTN4
256	548	Q9NQC3-5	RTN4				0	0	24200	2	2	0	0	0	2	1	5		42274	Isoform 5 of Reticulon-4 OS=Homo sapiens GN=RTN4
256	550	Q9NQC3	RTN4				0	0	24200	2	2	0	0	0	2	1	5		129931	Reticulon-4 OS=Homo sapiens GN=RTN4 PE=1 SV=2
231	519	P61769	B2MG		0		0	0	0	2	2	0	1	0	3	4	2	Carbamidomethylation	13715	Beta-2-microglobulin OS=Homo sapiens GN=B2M PE=1 SV=1
403	710	P62829	RL23				74100	0		1	1	0	0	0	1	1	0	Carbamidomethylation	14865	60S ribosomal protein L23 OS=Homo sapiens GN=RPL23 PE=1 SV=1
196	512	Q71UI9-2	H2AV						2030	2	1	0	3	0	3	3	6		12146	Isoform 2 of Histone H2A.V OS=Homo sapiens GN=H2AFV
196	513	Q71UI9	H2AV						2030	2	1	0	3	0	3	3	6		13509	Histone H2A.V OS=Homo sapiens GN=H2AFV PE=1 SV=3
196	514	P0C0S5	H2AZ						2030	2	1	0	3	0	3	3	6		13553	Histone H2A.Z OS=Homo sapiens GN=H2AFZ PE=1 SV=2
124	585	P43686-2	PRS6B				1910	0		1	1	0	0	0	3	1	0	Deamidation (NQ)	43508	Isoform 2 of 26S proteasome regulatory subunit 6B OS=Homo sapiens GN=PSMC4
124	590	P43686	PRS6B				1910	0		1	1	0	0	0	3	1	0	Deamidation (NQ)	47366	26S proteasome regulatory subunit 6B OS=Homo sapiens GN=PSMC4 PE=1 SV=2
490	707	O00487	PSDE				0		0	1	1	0	0	0	1	0	1		34577	26S proteasome non-ATPase regulatory subunit 14 OS=Homo sapiens GN=PSMD14 PE=1 SV=1
257	576	P12236	ADT3				82900	24000	197000	1	1	0	0	0	3	3	3		32866	ADP/ATP translocase 3 OS=Homo sapiens GN=SLC25A6 PE=1 SV=4
257	591	P12235	ADT1				82900	24000	197000	1	1	0	0	0	3	3	3		33065	ADP/ATP translocase 1 OS=Homo sapiens GN=SLC25A4 PE=1 SV=4
257	592	P05141	ADT2				82900	24000	197000	1	1	0	0	0	3	3	3		32852	ADP/ATP translocase 2 OS=Homo sapiens GN=SLC25A5 PE=1 SV=7
148	400	P38646	GRP75				17500	7270	22100	2	2	0	0	0	3	1	2		73681	Stress-70 protein mitochondrial OS=Homo sapiens GN=HSPA9 PE=1 SV=2
349	708	P62913-2	RL11				0	0	0	1	1	0	0	0	3	1	2		20124	Isoform 2 of 60S ribosomal protein L11 OS=Homo sapiens GN=RPL11
349	709	P62913	RL11				0	0	0	1	1	0	0	0	3	1	2		20252	60S ribosomal protein L11 OS=Homo sapiens GN=RPL11 PE=1 SV=2
245	705	P62314	SMD1				49800	14500	50800	1	1	0	0	0	4	3	4		13282	Small nuclear ribonucleoprotein Sm D1 OS=Homo sapiens GN=SNRPD1 PE=1 SV=1
227	428	P13797-3	PLST				0	0	0	1	1	0	0	0	2	3	4	Carbamidomethylation	65632	Isoform 3 of Plastin-3 OS=Homo sapiens GN=PLS3
227	429	P13797	PLST				0	0	0	1	1	0	0	0	2	3	4	Carbamidomethylation	70811	Plastin-3 OS=Homo sapiens GN=PLS3 PE=1 SV=4
311	706	O15372	EIF3H				5330	4450	11500	1	1	0	0	0	3	2	3		39930	Eukaryotic translation initiation factor 3 subunit H OS=Homo sapiens GN=EIF3H PE=1 SV=1
176	564	P61160	ARP2				29300	0	4820	1	1	0	0	0	3	2	3		44761	Actin-related protein 2 OS=Homo sapiens GN=ACTR2 PE=1 SV=1
176	565	P61160-2	ARP2				29300	0	4820	1	1	0	0	0	3	2	3		45377	Isoform 2 of Actin-related protein 2 OS=Homo sapiens GN=ACTR2
409	714	Q16658	FSCN1				0	0	23000	1	1	0	0	0	1	2	1	Carbamidomethylation	54530	Fascin OS=Homo sapiens GN=FSCN1 PE=1 SV=3
344	584	Q8NBS9-2	TXND5				0		0	1	1	0	0	0	1	0	3	Carbamidomethylation	36178	Isoform 2 of Thioredoxin domain-containing protein 5 OS=Homo sapiens GN=TXNDC5
344	597	Q8NBS9	TXND5				0		0	1	1	0	0	0	1	0	3	Carbamidomethylation	47629	Thioredoxin domain-containing protein 5 OS=Homo sapiens GN=TXNDC5 PE=1 SV=2
328	715	P62910	RL32				19100	0	12800	1	1	0	0	0	3	2	2	Carbamidomethylation	15860	60S ribosomal protein L32 OS=Homo sapiens GN=RPL32 PE=1 SV=2
428	579	P00387-3	NB5R3					0		1	1	0	0	0	0	2	0		38226	Isoform 3 of NADH-cytochrome b5 reductase 3 OS=Homo sapiens GN=CYB5R3
428	594	P00387-2	NB5R3					0		1	1	0	0	0	0	2	0		31629	Isoform 2 of NADH-cytochrome b5 reductase 3 OS=Homo sapiens GN=CYB5R3
428	595	P00387	NB5R3					0		1	1	0	0	0	0	2	0		34235	NADH-cytochrome b5 reductase 3 OS=Homo sapiens GN=CYB5R3 PE=1 SV=3
277	666	P62879-2	GBB2	10900	13700	16300	0		5720	1	1	2	2	3	1	0	1		25931	Isoform 2 of Guanine nucleotide-binding protein G(I)/G(S)/G(T) subunit beta-2 OS=Homo sapiens GN=GNB2
277	667	P62879	GBB2	10900	13700	16300	0		5720	1	1	2	2	3	1	0	1		37331	Guanine nucleotide-binding protein G(I)/G(S)/G(T) subunit beta-2 OS=Homo sapiens GN=GNB2 PE=1 SV=3
277	749	P62873-2	GBB1	10900	13700	16300	0		5720	1	1	2	2	3	1	0	1		36298	Isoform 2 of Guanine nucleotide-binding protein G(I)/G(S)/G(T) subunit beta-1 OS=Homo sapiens GN=GNB1
277	750	P62873	GBB1	10900	13700	16300	0		5720	1	1	2	2	3	1	0	1		37377	Guanine nucleotide-binding protein G(I)/G(S)/G(T) subunit beta-1 OS=Homo sapiens GN=GNB1 PE=1 SV=3
277	751	Q9HAV0	GBB4	10900	13700	16300	0		5720	1	1	2	2	3	1	0	1		37567	Guanine nucleotide-binding protein subunit beta-4 OS=Homo sapiens GN=GNB4 PE=1 SV=3
452	712	O00571-2	DDX3X				0		0	1	1	0	0	0	1	0	2		71355	Isoform 2 of ATP-dependent RNA helicase DDX3X OS=Homo sapiens GN=DDX3X
452	713	O00571	DDX3X				0		0	1	1	0	0	0	1	0	2		73244	ATP-dependent RNA helicase DDX3X OS=Homo sapiens GN=DDX3X PE=1 SV=3
362	424	P08133-2	ANXA6				1880			1	1	0	0	0	2	0	0	Carbamidomethylation	72424	Isoform 2 of Annexin A6 OS=Homo sapiens GN=ANXA6
362	425	P08133	ANXA6				1880			1	1	0	0	0	2	0	0	Carbamidomethylation	75873	Annexin A6 OS=Homo sapiens GN=ANXA6 PE=1 SV=3
450	516	Q02878	RL6						41200	2	2	0	0	0	0	0	2		32728	60S ribosomal protein L6 OS=Homo sapiens GN=RPL6 PE=1 SV=3
407	559	P62424	RL7A				18200			1	1	0	0	0	2	0	0		29996	60S ribosomal protein L7a OS=Homo sapiens GN=RPL7A PE=1 SV=2
495	540	Q9ULV4	COR1C						0	2	2	0	0	0	0	0	2		53249	Coronin-1C OS=Homo sapiens GN=CORO1C PE=1 SV=1
495	541	Q9ULV4-2	COR1C						0	2	2	0	0	0	0	0	2		54067	Isoform 2 of Coronin-1C OS=Homo sapiens GN=CORO1C
495	542	Q9ULV4-3	COR1C						0	2	2	0	0	0	0	0	2		58948	Isoform 3 of Coronin-1C OS=Homo sapiens GN=CORO1C
642	719	P62701	RS4X				0			1	1	0	0	0	1	0	0	Carbamidomethylation	29598	40S ribosomal protein S4 X isoform OS=Homo sapiens GN=RPS4X PE=1 SV=2
279	652	P05386	RLA1				550000	129000	155000	1	1	0	0	0	3	3	3		11514	60S acidic ribosomal protein P1 OS=Homo sapiens GN=RPLP1 PE=1 SV=1
386	566	P23396	RS3				0		15400	1	1	0	0	0	2	0	2		26688	40S ribosomal protein S3 OS=Homo sapiens GN=RPS3 PE=1 SV=2
386	567	P23396-2	RS3				0		15400	1	1	0	0	0	2	0	2		28487	Isoform 2 of 40S ribosomal protein S3 OS=Homo sapiens GN=RPS3
136	454	Q13200	PSMD2						0	1	1	0	0	0	0	0	1		100200	26S proteasome non-ATPase regulatory subunit 2 OS=Homo sapiens GN=PSMD2 PE=1 SV=3
421	603	P78527-2	PRKDC						0	1	1	0	0	0	0	0	2		465505	Isoform 2 of DNA-dependent protein kinase catalytic subunit OS=Homo sapiens GN=PRKDC
421	604	P78527	PRKDC						0	1	1	0	0	0	0	0	2		469093	DNA-dependent protein kinase catalytic subunit OS=Homo sapiens GN=PRKDC PE=1 SV=3
274	615	Q15005	SPCS2				0	0	5220	1	1	0	0	0	4	1	4	Carbamidomethylation	25003	Signal peptidase complex subunit 2 OS=Homo sapiens GN=SPCS2 PE=1 SV=3
304	650	O60888-2	CUTA				19000	11700	0	1	1	0	0	0	2	4	2		20925	Isoform A of Protein CutA OS=Homo sapiens GN=CUTA
304	727	O60888-3	CUTA				19000	11700	0	1	1	0	0	0	2	4	2		16833	Isoform C of Protein CutA OS=Homo sapiens GN=CUTA
304	728	O60888	CUTA				19000	11700	0	1	1	0	0	0	2	4	2		19116	Protein CutA OS=Homo sapiens GN=CUTA PE=1 SV=2
379	628	Q08431	MFGM		6610	7380				1	1	0	2	3	0	0	0	Carbamidomethylation	43123	Lactadherin OS=Homo sapiens GN=MFGE8 PE=1 SV=2
379	782	Q08431-3	MFGM		6610	7380				1	1	0	2	3	0	0	0	Carbamidomethylation	37523	Isoform 3 of Lactadherin OS=Homo sapiens GN=MFGE8
284	535	P49327	FAS				31700	0	17000	2	2	0	0	0	2	3	3		273424	Fatty acid synthase OS=Homo sapiens GN=FASN PE=1 SV=3
133	586	Q5SSJ5-3	HP1B3					0	8410	1	1	0	0	0	0	3	2		44435	Isoform 3 of Heterochromatin protein 1-binding protein 3 OS=Homo sapiens GN=HP1BP3
133	598	Q5SSJ5-2	HP1B3					0	8410	1	1	0	0	0	0	3	2		57212	Isoform 2 of Heterochromatin protein 1-binding protein 3 OS=Homo sapiens GN=HP1BP3
133	599	Q5SSJ5	HP1B3					0	8410	1	1	0	0	0	0	3	2		61207	Heterochromatin protein 1-binding protein 3 OS=Homo sapiens GN=HP1BP3 PE=1 SV=1
406	533	Q07020-2	RL18				0	0	0	2	2	0	0	0	1	1	2		18091	Isoform 2 of 60S ribosomal protein L18 OS=Homo sapiens GN=RPL18
406	534	Q07020	RL18				0	0	0	2	2	0	0	0	1	1	2		21634	60S ribosomal protein L18 OS=Homo sapiens GN=RPL18 PE=1 SV=2
427	476	Q8WX93-3	PALLD				0	0		1	1	0	0	0	1	1	0		108631	Isoform 3 of Palladin OS=Homo sapiens GN=PALLD
427	477	Q8WX93	PALLD				0	0		1	1	0	0	0	1	1	0		150564	Palladin OS=Homo sapiens GN=PALLD PE=1 SV=3
427	478	Q8WX93-4	PALLD				0	0		1	1	0	0	0	1	1	0		73322	Isoform 4 of Palladin OS=Homo sapiens GN=PALLD
475	580	Q99715-4	COCA1		0					1	1	0	1	0	0	0	0		324570	Isoform 4 of Collagen alpha-1(XII) chain OS=Homo sapiens GN=COL12A1
475	581	Q99715	COCA1		0					1	1	0	1	0	0	0	0		333147	Collagen alpha-1(XII) chain OS=Homo sapiens GN=COL12A1 PE=1 SV=2
230	574	P00751	CFAB	32600	26600					1	1	3	4	0	0	0	0		85533	Complement factor B OS=Homo sapiens GN=CFB PE=1 SV=2
348	568	P10643	CO7	9010						2	2	4	0	0	0	0	0	Carbamidomethylation	93518	Complement component C7 OS=Homo sapiens GN=C7 PE=1 SV=2
570	632	O14974-2	MYPT1					0		1	1	0	0	0	0	1	0		111185	Isoform 2 of Protein phosphatase 1 regulatory subunit 12A OS=Homo sapiens GN=PPP1R12A
570	633	O14974	MYPT1					0		1	1	0	0	0	0	1	0		115281	Protein phosphatase 1 regulatory subunit 12A OS=Homo sapiens GN=PPP1R12A PE=1 SV=1
570	634	O14974-5	MYPT1					0		1	1	0	0	0	0	1	0		105641	Isoform 5 of Protein phosphatase 1 regulatory subunit 12A OS=Homo sapiens GN=PPP1R12A
252	469	P26599-2	PTBP1				14000	3230	9550	1	1	0	0	0	5	2	1		59037	Isoform 2 of Polypyrimidine tract-binding protein 1 OS=Homo sapiens GN=PTBP1
339	596	P25398	RS12				0			1	1	0	0	0	1	0	0	Carbamidomethylation	14515	40S ribosomal protein S12 OS=Homo sapiens GN=RPS12 PE=1 SV=3
388	781	P49006	MRP		0	0		0		1	1	0	1	2	0	2	0		19529	MARCKS-related protein OS=Homo sapiens GN=MARCKSL1 PE=1 SV=2
350	732	Q9C005	DPY30				0	0	0	1	1	0	0	0	3	1	2		11250	Protein dpy-30 homolog OS=Homo sapiens GN=DPY30 PE=1 SV=1
594	613	P23526-2	SAHH			0				1	1	0	0	1	0	0	0		44659	Isoform 2 of Adenosylhomocysteinase OS=Homo sapiens GN=AHCY
594	614	P23526	SAHH			0				1	1	0	0	1	0	0	0		47716	Adenosylhomocysteinase OS=Homo sapiens GN=AHCY PE=1 SV=4
445	681	Q7Z3E5-2	ARMC9					0	4950	1	1	0	0	0	0	1	2		75579	Isoform 2 of LisH domain-containing protein ARMC9 OS=Homo sapiens GN=ARMC9
445	682	Q7Z3E5	ARMC9					0	4950	1	1	0	0	0	0	1	2		91762	LisH domain-containing protein ARMC9 OS=Homo sapiens GN=ARMC9 PE=1 SV=2
498	733	P40616-2	ARL1						0	1	1	0	0	0	0	0	2		18565	Isoform 2 of ADP-ribosylation factor-like protein 1 OS=Homo sapiens GN=ARL1
498	734	P40616	ARL1						0	1	1	0	0	0	0	0	2		20418	ADP-ribosylation factor-like protein 1 OS=Homo sapiens GN=ARL1 PE=1 SV=1
335	745	Q16836	HCDH				9130		5310	1	1	0	0	0	2	0	2		34294	Hydroxyacyl-coenzyme A dehydrogenase mitochondrial OS=Homo sapiens GN=HADH PE=1 SV=3
335	746	Q16836-3	HCDH				9130		5310	1	1	0	0	0	2	0	2		36051	Isoform 3 of Hydroxyacyl-coenzyme A dehydrogenase mitochondrial OS=Homo sapiens GN=HADH
335	747	Q16836-2	HCDH				9130		5310	1	1	0	0	0	2	0	2		42140	Isoform 2 of Hydroxyacyl-coenzyme A dehydrogenase mitochondrial OS=Homo sapiens GN=HADH
264	735	Q99832-2	TCPH				57700	44900	105000	1	1	0	0	0	3	3	3	Carbamidomethylation	37499	Isoform 2 of T-complex protein 1 subunit eta OS=Homo sapiens GN=CCT7
264	736	Q99832-4	TCPH				57700	44900	105000	1	1	0	0	0	3	3	3	Carbamidomethylation	50352	Isoform 4 of T-complex protein 1 subunit eta OS=Homo sapiens GN=CCT7
264	737	Q99832-3	TCPH				57700	44900	105000	1	1	0	0	0	3	3	3	Carbamidomethylation	54804	Isoform 3 of T-complex protein 1 subunit eta OS=Homo sapiens GN=CCT7
264	738	Q99832	TCPH				57700	44900	105000	1	1	0	0	0	3	3	3	Carbamidomethylation	59367	T-complex protein 1 subunit eta OS=Homo sapiens GN=CCT7 PE=1 SV=2
258	799	Q09160	1A80	0	88600	0	0	0		1	1	1	3	1	1	2	0		40792	HLA class I histocompatibility antigen A-80 alpha chain OS=Homo sapiens GN=HLA-A PE=1 SV=1
258	800	P30450	1A26	0	88600	0	0	0		1	1	1	3	1	1	2	0		41062	HLA class I histocompatibility antigen A-26 alpha chain OS=Homo sapiens GN=HLA-A PE=1 SV=2
258	801	P30504	1C04	0	88600	0	0	0		1	1	1	3	1	1	2	0		40995	HLA class I histocompatibility antigen Cw-4 alpha chain OS=Homo sapiens GN=HLA-C PE=1 SV=1
489	647	Q8WUM4	PDC6I				0	0		1	1	0	0	0	1	1	0		96023	Programmed cell death 6-interacting protein OS=Homo sapiens GN=PDCD6IP PE=1 SV=1
489	648	Q8WUM4-2	PDC6I				0	0		1	1	0	0	0	1	1	0		96772	Isoform 2 of Programmed cell death 6-interacting protein OS=Homo sapiens GN=PDCD6IP
334	740	Q99714-2	HCD2				7380	0	2830	1	1	0	0	0	2	3	2		25984	Isoform 2 of 3-hydroxyacyl-CoA dehydrogenase type-2 OS=Homo sapiens GN=HSD17B10
334	741	Q99714	HCD2				7380	0	2830	1	1	0	0	0	2	3	2		26923	3-hydroxyacyl-CoA dehydrogenase type-2 OS=Homo sapiens GN=HSD17B10 PE=1 SV=3
342	500	P46783	RS10						0	1	1	0	0	0	0	0	1		18898	40S ribosomal protein S10 OS=Homo sapiens GN=RPS10 PE=1 SV=1
303	448	Q06033-2	ITIH3	0						1	1	1	0	0	0	0	0		99328	Isoform 2 of Inter-alpha-trypsin inhibitor heavy chain H3 OS=Homo sapiens GN=ITIH3
303	449	Q06033	ITIH3	0						1	1	1	0	0	0	0	0		99849	Inter-alpha-trypsin inhibitor heavy chain H3 OS=Homo sapiens GN=ITIH3 PE=1 SV=2
286	752	Q14103-3	HNRPD				8970	0	0	1	1	0	0	0	3	3	3		32835	Isoform 3 of Heterogeneous nuclear ribonucleoprotein D0 OS=Homo sapiens GN=HNRNPD
286	753	Q14103	HNRPD				8970	0	0	1	1	0	0	0	3	3	3		38434	Heterogeneous nuclear ribonucleoprotein D0 OS=Homo sapiens GN=HNRNPD PE=1 SV=1
423	619	Q04637-5	IF4G1				0		0	1	1	0	0	0	1	0	2	Carbamidomethylation	158516	Isoform D of Eukaryotic translation initiation factor 4 gamma 1 OS=Homo sapiens GN=EIF4G1
423	620	Q04637-4	IF4G1				0		0	1	1	0	0	0	1	0	2	Carbamidomethylation	166618	Isoform C of Eukaryotic translation initiation factor 4 gamma 1 OS=Homo sapiens GN=EIF4G1
423	621	Q04637-3	IF4G1				0		0	1	1	0	0	0	1	0	2	Carbamidomethylation	171512	Isoform B of Eukaryotic translation initiation factor 4 gamma 1 OS=Homo sapiens GN=EIF4G1
423	622	Q04637	IF4G1				0		0	1	1	0	0	0	1	0	2	Carbamidomethylation	175490	Eukaryotic translation initiation factor 4 gamma 1 OS=Homo sapiens GN=EIF4G1 PE=1 SV=4
423	623	Q04637-8	IF4G1				0		0	1	1	0	0	0	1	0	2	Carbamidomethylation	175618	Isoform 8 of Eukaryotic translation initiation factor 4 gamma 1 OS=Homo sapiens GN=EIF4G1
423	624	Q04637-9	IF4G1				0		0	1	1	0	0	0	1	0	2	Carbamidomethylation	176236	Isoform 9 of Eukaryotic translation initiation factor 4 gamma 1 OS=Homo sapiens GN=EIF4G1
423	625	Q04637-6	IF4G1				0		0	1	1	0	0	0	1	0	2	Carbamidomethylation	154804	Isoform E of Eukaryotic translation initiation factor 4 gamma 1 OS=Homo sapiens GN=EIF4G1
423	626	Q04637-7	IF4G1				0		0	1	1	0	0	0	1	0	2	Carbamidomethylation	154932	Isoform 7 of Eukaryotic translation initiation factor 4 gamma 1 OS=Homo sapiens GN=EIF4G1
477	673	P48509	CD151			4690				1	1	0	0	2	0	0	0		28295	CD151 antigen OS=Homo sapiens GN=CD151 PE=1 SV=3
234	563	P13693	TCTP					19900		1	1	0	0	0	0	1	0		19595	Translationally-controlled tumor protein OS=Homo sapiens GN=TPT1 PE=1 SV=1
411	764	O43399-6	TPD54				0	0		1	1	0	0	0	2	2	0		17473	Isoform 6 of Tumor protein D54 OS=Homo sapiens GN=TPD52L2
411	765	O43399-2	TPD54				0	0		1	1	0	0	0	2	2	0		19901	Isoform 2 of Tumor protein D54 OS=Homo sapiens GN=TPD52L2
411	766	O43399-4	TPD54				0	0		1	1	0	0	0	2	2	0		21450	Isoform 4 of Tumor protein D54 OS=Homo sapiens GN=TPD52L2
411	767	O43399	TPD54				0	0		1	1	0	0	0	2	2	0		22238	Tumor protein D54 OS=Homo sapiens GN=TPD52L2 PE=1 SV=2
411	768	O43399-3	TPD54				0	0		1	1	0	0	0	2	2	0		22517	Isoform 3 of Tumor protein D54 OS=Homo sapiens GN=TPD52L2
411	769	O43399-5	TPD54				0	0		1	1	0	0	0	2	2	0		23787	Isoform 5 of Tumor protein D54 OS=Homo sapiens GN=TPD52L2
411	770	O43399-7	TPD54				0	0		1	1	0	0	0	2	2	0		24854	Isoform 7 of Tumor protein D54 OS=Homo sapiens GN=TPD52L2
443	553	P18085	ARF4						1230	1	1	0	0	0	0	0	1		20511	ADP-ribosylation factor 4 OS=Homo sapiens GN=ARF4 PE=1 SV=3
643	755	P62136-3	PP1A					0		1	1	0	0	0	0	1	0	Carbamidomethylation	32595	Isoform 3 of Serine/threonine-protein phosphatase PP1-alpha catalytic subunit OS=Homo sapiens GN=PPP1CA
643	756	P36873	PP1G					0		1	1	0	0	0	0	1	0	Carbamidomethylation	36984	Serine/threonine-protein phosphatase PP1-gamma catalytic subunit OS=Homo sapiens GN=PPP1CC PE=1 SV=1
643	757	P62140	PP1B					0		1	1	0	0	0	0	1	0	Carbamidomethylation	37187	Serine/threonine-protein phosphatase PP1-beta catalytic subunit OS=Homo sapiens GN=PPP1CB PE=1 SV=3
643	758	P62136	PP1A					0		1	1	0	0	0	0	1	0	Carbamidomethylation	37512	Serine/threonine-protein phosphatase PP1-alpha catalytic subunit OS=Homo sapiens GN=PPP1CA PE=1 SV=1
643	759	P36873-2	PP1G					0		1	1	0	0	0	0	1	0	Carbamidomethylation	38518	Isoform Gamma-2 of Serine/threonine-protein phosphatase PP1-gamma catalytic subunit OS=Homo sapiens GN=PPP1CC
643	760	P62136-2	PP1A					0		1	1	0	0	0	0	1	0	Carbamidomethylation	38631	Isoform 2 of Serine/threonine-protein phosphatase PP1-alpha catalytic subunit OS=Homo sapiens GN=PPP1CA
269	612	P00747	PLMN	0						1	1	3	0	0	0	0	0		90569	Plasminogen OS=Homo sapiens GN=PLG PE=1 SV=2
446	763	P20674	COX5A					7020		1	1	0	0	0	0	2	0		16762	Cytochrome c oxidase subunit 5A mitochondrial OS=Homo sapiens GN=COX5A PE=1 SV=2
404	761	P25705-2	ATPA				0	17300	0	1	1	0	0	0	1	1	1		54494	Isoform 2 of ATP synthase subunit alpha mitochondrial OS=Homo sapiens GN=ATP5A1
404	762	P25705	ATPA				0	17300	0	1	1	0	0	0	1	1	1		59751	ATP synthase subunit alpha mitochondrial OS=Homo sapiens GN=ATP5A1 PE=1 SV=1
177	754	P62857	RS28				116000	59800	75600	1	1	0	0	0	6	6	6	Carbamidomethylation	7841	40S ribosomal protein S28 OS=Homo sapiens GN=RPS28 PE=1 SV=1
644	774	Q15041	AR6P1				0			1	1	0	0	0	1	0	0		23363	ADP-ribosylation factor-like protein 6-interacting protein 1 OS=Homo sapiens GN=ARL6IP1 PE=1 SV=2
546	616	Q9P2E9-2	RRBP1					0		1	1	0	0	0	0	1	0		152188	Isoform 1 of Ribosome-binding protein 1 OS=Homo sapiens GN=RRBP1
546	617	Q9P2E9	RRBP1					0		1	1	0	0	0	0	1	0		152472	Ribosome-binding protein 1 OS=Homo sapiens GN=RRBP1 PE=1 SV=4
546	629	Q9P2E9-3	RRBP1					0		1	1	0	0	0	0	1	0		108631	Isoform 2 of Ribosome-binding protein 1 OS=Homo sapiens GN=RRBP1
486	552	Q7KZF4	SND1				0		0	2	2	0	0	0	1	0	1	Carbamidomethylation	101997	Staphylococcal nuclease domain-containing protein 1 OS=Homo sapiens GN=SND1 PE=1 SV=1
476	664	Q13310-2	PABP4				0			1	1	0	0	0	2	0	0		69579	Isoform 2 of Polyadenylate-binding protein 4 OS=Homo sapiens GN=PABPC4
476	665	Q13310-3	PABP4				0			1	1	0	0	0	2	0	0		72391	Isoform 3 of Polyadenylate-binding protein 4 OS=Homo sapiens GN=PABPC4
476	686	Q13310	PABP4				0			1	1	0	0	0	2	0	0		70783	Polyadenylate-binding protein 4 OS=Homo sapiens GN=PABPC4 PE=1 SV=1
476	775	P11940-2	PABP1				0			1	1	0	0	0	2	0	0		61181	Isoform 2 of Polyadenylate-binding protein 1 OS=Homo sapiens GN=PABPC1
476	776	P11940	PABP1				0			1	1	0	0	0	2	0	0		70671	Polyadenylate-binding protein 1 OS=Homo sapiens GN=PABPC1 PE=1 SV=2
439	606	Q14764	MVP						0	1	1	0	0	0	0	0	2	Deamidation (NQ)	99327	Major vault protein OS=Homo sapiens GN=MVP PE=1 SV=4
613	772	P55884	EIF3B						0	1	1	0	0	0	0	0	1		92482	Eukaryotic translation initiation factor 3 subunit B OS=Homo sapiens GN=EIF3B PE=1 SV=3
613	773	P55884-2	EIF3B						0	1	1	0	0	0	0	0	1		99029	Isoform 2 of Eukaryotic translation initiation factor 3 subunit B OS=Homo sapiens GN=EIF3B
595	653	Q96D15	RCN3				0			1	1	0	0	0	1	0	0		37493	Reticulocalbin-3 OS=Homo sapiens GN=RCN3 PE=1 SV=1
645	780	Q02543	RL18A				0			1	1	0	0	0	1	0	0	Carbamidomethylation	20762	60S ribosomal protein L18a OS=Homo sapiens GN=RPL18A PE=1 SV=2
297	575	Q14624-4	ITIH4	13400	0	0				1	1	1	1	1	0	0	0		93852	Isoform 4 of Inter-alpha-trypsin inhibitor heavy chain H4 OS=Homo sapiens GN=ITIH4
646	820	P07288-3	KLK3		3500					1	1	0	1	0	0	0	0		23725	Isoform 3 of Prostate-specific antigen OS=Homo sapiens GN=KLK3
646	821	P07288-5	KLK3		3500					1	1	0	1	0	0	0	0		25116	Isoform 5 of Prostate-specific antigen OS=Homo sapiens GN=KLK3
646	822	P07288-2	KLK3		3500					1	1	0	1	0	0	0	0		26317	Isoform 2 of Prostate-specific antigen OS=Homo sapiens GN=KLK3
646	823	P07288	KLK3		3500					1	1	0	1	0	0	0	0		28741	Prostate-specific antigen OS=Homo sapiens GN=KLK3 PE=1 SV=2
275	685	P68402	PA1B2				745000		799000	1	1	0	0	0	3	0	3		25569	Platelet-activating factor acetylhydrolase IB subunit beta OS=Homo sapiens GN=PAFAH1B2 PE=1 SV=1
275	786	P68402-3	PA1B2				745000		799000	1	1	0	0	0	3	0	3		14888	Isoform 3 of Platelet-activating factor acetylhydrolase IB subunit beta OS=Homo sapiens GN=PAFAH1B2
275	787	P68402-2	PA1B2				745000		799000	1	1	0	0	0	3	0	3		17833	Isoform 2 of Platelet-activating factor acetylhydrolase IB subunit beta OS=Homo sapiens GN=PAFAH1B2
275	788	P68402-4	PA1B2				745000		799000	1	1	0	0	0	3	0	3		22734	Isoform 4 of Platelet-activating factor acetylhydrolase IB subunit beta OS=Homo sapiens GN=PAFAH1B2
373	639	P57721-2	PCBP3				14200		12600	1	1	0	0	0	2	0	3	Carbamidomethylation	36817	Isoform 2 of Poly(rC)-binding protein 3 OS=Homo sapiens GN=PCBP3
373	640	P57721-3	PCBP3				14200		12600	1	1	0	0	0	2	0	3	Carbamidomethylation	36945	Isoform 3 of Poly(rC)-binding protein 3 OS=Homo sapiens GN=PCBP3
373	641	P57721-5	PCBP3				14200		12600	1	1	0	0	0	2	0	3	Carbamidomethylation	37341	Isoform 5 of Poly(rC)-binding protein 3 OS=Homo sapiens GN=PCBP3
373	642	P57721-4	PCBP3				14200		12600	1	1	0	0	0	2	0	3	Carbamidomethylation	39337	Isoform 4 of Poly(rC)-binding protein 3 OS=Homo sapiens GN=PCBP3
373	643	P57721	PCBP3				14200		12600	1	1	0	0	0	2	0	3	Carbamidomethylation	39465	Poly(rC)-binding protein 3 OS=Homo sapiens GN=PCBP3 PE=2 SV=2
373	654	Q15366-7	PCBP2				14200		12600	1	1	0	0	0	2	0	3	Carbamidomethylation	33497	Isoform 7 of Poly(rC)-binding protein 2 OS=Homo sapiens GN=PCBP2
373	655	Q15366-8	PCBP2				14200		12600	1	1	0	0	0	2	0	3	Carbamidomethylation	33926	Isoform 8 of Poly(rC)-binding protein 2 OS=Homo sapiens GN=PCBP2
373	656	Q15366-4	PCBP2				14200		12600	1	1	0	0	0	2	0	3	Carbamidomethylation	34917	Isoform 4 of Poly(rC)-binding protein 2 OS=Homo sapiens GN=PCBP2
373	657	Q15366-5	PCBP2				14200		12600	1	1	0	0	0	2	0	3	Carbamidomethylation	35347	Isoform 5 of Poly(rC)-binding protein 2 OS=Homo sapiens GN=PCBP2
373	658	Q15365	PCBP1				14200		12600	1	1	0	0	0	2	0	3	Carbamidomethylation	37498	Poly(rC)-binding protein 1 OS=Homo sapiens GN=PCBP1 PE=1 SV=2
373	659	Q15366-6	PCBP2				14200		12600	1	1	0	0	0	2	0	3	Carbamidomethylation	38151	Isoform 6 of Poly(rC)-binding protein 2 OS=Homo sapiens GN=PCBP2
373	660	Q15366-3	PCBP2				14200		12600	1	1	0	0	0	2	0	3	Carbamidomethylation	38222	Isoform 3 of Poly(rC)-binding protein 2 OS=Homo sapiens GN=PCBP2
373	661	Q15366	PCBP2				14200		12600	1	1	0	0	0	2	0	3	Carbamidomethylation	38580	Poly(rC)-binding protein 2 OS=Homo sapiens GN=PCBP2 PE=1 SV=1
373	662	Q15366-2	PCBP2				14200		12600	1	1	0	0	0	2	0	3	Carbamidomethylation	38651	Isoform 2 of Poly(rC)-binding protein 2 OS=Homo sapiens GN=PCBP2
614	791	P30084	ECHM					0		1	1	0	0	0	0	1	0	Carbamidomethylation	31387	Enoyl-CoA hydratase mitochondrial OS=Homo sapiens GN=ECHS1 PE=1 SV=4
266	798	P62277	RS13				16300	4700	24600	1	1	0	0	0	4	1	4		17222	40S ribosomal protein S13 OS=Homo sapiens GN=RPS13 PE=1 SV=2
412	789	B2RPK0	HGB1A					0	0	1	1	0	0	0	0	1	3		24238	Putative high mobility group protein B1-like 1 OS=Homo sapiens GN=HMGB1P1 PE=5 SV=1
412	790	P09429	HMGB1					0	0	1	1	0	0	0	0	1	3		24894	High mobility group protein B1 OS=Homo sapiens GN=HMGB1 PE=1 SV=3
612	678	P62820-3	RAB1A						0	1	1	0	0	0	0	0	1		13903	Isoform 3 of Ras-related protein Rab-1A OS=Homo sapiens GN=RAB1A
612	679	P62820-2	RAB1A						0	1	1	0	0	0	0	0	1		15331	Isoform 2 of Ras-related protein Rab-1A OS=Homo sapiens GN=RAB1A
612	680	P62820	RAB1A						0	1	1	0	0	0	0	0	1		22678	Ras-related protein Rab-1A OS=Homo sapiens GN=RAB1A PE=1 SV=3
329	792	P15880	RS2				0		3810	1	1	0	0	0	2	0	1	Carbamidomethylation	31324	40S ribosomal protein S2 OS=Homo sapiens GN=RPS2 PE=1 SV=2
276	688	P29692	EF1D				123000	35700	48400	1	1	0	0	0	3	2	3		31122	Elongation factor 1-delta OS=Homo sapiens GN=EEF1D PE=1 SV=5
276	689	P29692-2	EF1D				123000	35700	48400	1	1	0	0	0	3	2	3		71408	Isoform 2 of Elongation factor 1-delta OS=Homo sapiens GN=EEF1D
336	796	O00567	NOP56				0		0	1	1	0	0	0	2	0	1		66050	Nucleolar protein 56 OS=Homo sapiens GN=NOP56 PE=1 SV=4
647	836	Q15758-3	AAAT	0						1	1	1	0	0	0	0	0	Carbamidomethylation	33710	Isoform 3 of Neutral amino acid transporter B(0) OS=Homo sapiens GN=SLC1A5
647	837	Q15758-2	AAAT	0						1	1	1	0	0	0	0	0	Carbamidomethylation	36636	Isoform 2 of Neutral amino acid transporter B(0) OS=Homo sapiens GN=SLC1A5
647	838	Q15758	AAAT	0						1	1	1	0	0	0	0	0	Carbamidomethylation	56598	Neutral amino acid transporter B(0) OS=Homo sapiens GN=SLC1A5 PE=1 SV=2
441	663	P13645	K1C10			4440				1	1	0	0	3	0	0	0		58827	Keratin type I cytoskeletal 10 OS=Homo sapiens GN=KRT10 PE=1 SV=6
265	797	Q14192	FHL2				4700	4400	13200	1	1	0	0	0	4	3	3	Carbamidomethylation	32193	Four and a half LIM domains protein 2 OS=Homo sapiens GN=FHL2 PE=1 SV=3
345	671	P04844-2	RPN2				14700	14300	24000	1	1	0	0	0	2	1	3		67723	Isoform 2 of Dolichyl-diphosphooligosaccharide--protein glycosyltransferase subunit 2 OS=Homo sapiens GN=RPN2
345	672	P04844	RPN2				14700	14300	24000	1	1	0	0	0	2	1	3		69284	Dolichyl-diphosphooligosaccharide--protein glycosyltransferase subunit 2 OS=Homo sapiens GN=RPN2 PE=1 SV=3
611	631	P23246	SFPQ				0			1	1	0	0	0	1	0	0	Deamidation (NQ)	76150	Splicing factor proline- and glutamine-rich OS=Homo sapiens GN=SFPQ PE=1 SV=2
240	783	P12268	IMDH2				24900	5680	0	1	1	0	0	0	2	1	1	Deamidation (NQ); Carbamidomethylation	55805	Inosine-5'-monophosphate dehydrogenase 2 OS=Homo sapiens GN=IMPDH2 PE=1 SV=2
352	827	P61313-2	RL15	0	0		0		0	1	1	1	1	0	1	0	1		16717	Isoform 2 of 60S ribosomal protein L15 OS=Homo sapiens GN=RPL15
352	828	P61313	RL15	0	0		0		0	1	1	1	1	0	1	0	1		24146	60S ribosomal protein L15 OS=Homo sapiens GN=RPL15 PE=1 SV=2
444	589	Q9Y4L1	HYOU1						0	1	1	0	0	0	0	0	1		111335	Hypoxia up-regulated protein 1 OS=Homo sapiens GN=HYOU1 PE=1 SV=1
649	873	P02749	APOH			0				1	1	0	0	1	0	0	0	Carbamidomethylation	38298	Beta-2-glycoprotein 1 OS=Homo sapiens GN=APOH PE=1 SV=3
305	814	P53007	TXTP					0	0	1	1	0	0	0	0	2	1		34013	Tricarboxylate transport protein mitochondrial OS=Homo sapiens GN=SLC25A1 PE=1 SV=2
571	637	Q99729-3	ROAA					0		1	1	0	0	0	0	1	0		30588	Isoform 3 of Heterogeneous nuclear ribonucleoprotein A/B OS=Homo sapiens GN=HNRNPAB
571	638	Q99729-4	ROAA					0		1	1	0	0	0	0	1	0		30701	Isoform 4 of Heterogeneous nuclear ribonucleoprotein A/B OS=Homo sapiens GN=HNRNPAB
571	815	Q99729	ROAA					0		1	1	0	0	0	0	1	0		36225	Heterogeneous nuclear ribonucleoprotein A/B OS=Homo sapiens GN=HNRNPAB PE=1 SV=2
571	816	Q99729-2	ROAA					0		1	1	0	0	0	0	1	0		35968	Isoform 2 of Heterogeneous nuclear ribonucleoprotein A/B OS=Homo sapiens GN=HNRNPAB
499	824	Q16181-2	SEPT7					0		1	1	0	0	0	0	2	0		50581	Isoform 2 of Septin-7 OS=Homo sapiens GN=SEPT7
499	825	Q16181	SEPT7					0		1	1	0	0	0	0	2	0		50680	Septin-7 OS=Homo sapiens GN=SEPT7 PE=1 SV=2
351	826	P62750	RL23A				0	0	4300	1	1	0	0	0	2	1	2		17695	60S ribosomal protein L23a OS=Homo sapiens GN=RPL23A PE=1 SV=1
447	882	P02787	TRFE			35000				1	1	0	0	3	0	0	0	Carbamidomethylation	77064	Serotransferrin OS=Homo sapiens GN=TF PE=1 SV=3
312	875	Q9H8M2-4	BRD9	206000	101000	98400				1	1	3	3	2	0	0	0		26247	Isoform 4 of Bromodomain-containing protein 9 OS=Homo sapiens GN=BRD9
312	880	Q9H8M2-3	BRD9	206000	101000	98400				1	1	3	3	2	0	0	0		53249	Isoform 3 of Bromodomain-containing protein 9 OS=Homo sapiens GN=BRD9
312	883	Q9H8M2-1	BRD9	206000	101000	98400				1	1	3	3	2	0	0	0		55665	Isoform 5 of Bromodomain-containing protein 9 OS=Homo sapiens GN=BRD9
312	884	Q9H8M2-6	BRD9	206000	101000	98400				1	1	3	3	2	0	0	0		60763	Isoform 6 of Bromodomain-containing protein 9 OS=Homo sapiens GN=BRD9
312	887	Q9H8M2	BRD9	206000	101000	98400				1	1	3	3	2	0	0	0		67000	Bromodomain-containing protein 9 OS=Homo sapiens GN=BRD9 PE=1 SV=2
615	819	P13804-2	ETFA						0	1	1	0	0	0	0	0	1		30026	Isoform 2 of Electron transfer flavoprotein subunit alpha mitochondrial OS=Homo sapiens GN=ETFA
616	845	Q03135-2	CAV1		0					1	1	0	1	0	0	0	0		17023	Isoform 2 of Caveolin-1 OS=Homo sapiens GN=CAV1
616	846	Q03135	CAV1		0					1	1	0	1	0	0	0	0		20472	Caveolin-1 OS=Homo sapiens GN=CAV1 PE=1 SV=4
453	829	P18621-2	RL17				4960			1	1	0	0	0	3	0	0		17094	Isoform 2 of 60S ribosomal protein L17 OS=Homo sapiens GN=RPL17
453	830	P18621	RL17				4960			1	1	0	0	0	3	0	0		21397	60S ribosomal protein L17 OS=Homo sapiens GN=RPL17 PE=1 SV=3
453	831	P18621-3	RL17				4960			1	1	0	0	0	3	0	0		26373	Isoform 3 of 60S ribosomal protein L17 OS=Homo sapiens GN=RPL17
596	809	Q14247-3	SRC8						442	1	1	0	0	0	0	0	1	Carbamidomethylation	57467	Isoform 3 of Src substrate cortactin OS=Homo sapiens GN=CTTN
596	810	Q14247	SRC8						442	1	1	0	0	0	0	0	1	Carbamidomethylation	61586	Src substrate cortactin OS=Homo sapiens GN=CTTN PE=1 SV=2
596	811	Q14247-2	SRC8						442	1	1	0	0	0	0	0	1	Carbamidomethylation	70959	Isoform 2 of Src substrate cortactin OS=Homo sapiens GN=CTTN
488	646	Q14697	GANAB				0			1	1	0	0	0	1	0	0		106874	Neutral alpha-glucosidase AB OS=Homo sapiens GN=GANAB PE=1 SV=3
424	918	Q6W4X9	MUC6	797						1	1	1	0	0	0	0	0		257050	Mucin-6 OS=Homo sapiens GN=MUC6 PE=1 SV=3
620	938	P02751-10	FINC			0				1	1	0	0	1	0	0	0		239624	Isoform 10 of Fibronectin OS=Homo sapiens GN=FN1
620	939	P02751-14	FINC			0				1	1	0	0	1	0	0	0		249400	Isoform 14 of Fibronectin OS=Homo sapiens GN=FN1
449	930	P49747-2	COMP	0						1	1	1	0	0	0	0	0		77214	Isoform 2 of Cartilage oligomeric matrix protein OS=Homo sapiens GN=COMP
449	931	P49747	COMP	0						1	1	1	0	0	0	0	0		82861	Cartilage oligomeric matrix protein OS=Homo sapiens GN=COMP PE=1 SV=2
648	848	P05198	IF2A					0		1	1	0	0	0	0	1	0		36112	Eukaryotic translation initiation factor 2 subunit 1 OS=Homo sapiens GN=EIF2S1 PE=1 SV=3

## Sheet: Table S3 - contaminants
Potential contaminant	Taxonomy	Protein name	Majority protein IDs
+			ENSEMBL:ENSBTAP00000001528;CON__ENSEMBL:ENSBTAP00000001528
+			ENSEMBL:ENSBTAP00000006074;CON__ENSEMBL:ENSBTAP00000006074
+	Bos taurus	C4a anaphylatoxin;Complement C4;Complement C4 alpha chain;Complement C4 gamma chain	ENSEMBL:ENSBTAP00000007350;CON__ENSEMBL:ENSBTAP00000007350;P01030;CON__P01030
+			ENSEMBL:ENSBTAP00000013050;CON__ENSEMBL:ENSBTAP00000013050
+			ENSEMBL:ENSBTAP00000016046;CON__ENSEMBL:ENSBTAP00000016046
+	Bos taurus	Vitamin D-binding protein	Q3MHN5;CON__Q3MHN5;ENSEMBL:ENSBTAP00000018229;CON__ENSEMBL:ENSBTAP00000018229
+			ENSEMBL:ENSBTAP00000018574;CON__ENSEMBL:ENSBTAP00000018574
+			ENSEMBL:ENSBTAP00000024146;CON__ENSEMBL:ENSBTAP00000024146
+			ENSEMBL:ENSBTAP00000025008;CON__ENSEMBL:ENSBTAP00000025008
+			ENSEMBL:ENSBTAP00000032840;CON__ENSEMBL:ENSBTAP00000032840
+			ENSEMBL:ENSBTAP00000037665;CON__ENSEMBL:ENSBTAP00000037665
+	Bos taurus	Activation peptide fragment 1;Activation peptide fragment 2;Prothrombin;Thrombin heavy chain;Thrombin light chain	P00735;CON__P00735
+	Sus scrofa	Trypsin	P00761;CON__P00761
+	Bos taurus	Alpha-1-microglobulin;Inter-alpha-trypsin inhibitor light chain;Protein AMBP;Trypstatin	P00978;CON__P00978
+	Bos taurus	Hemoglobin subunit alpha	P01966;CON__P01966
+	Bos taurus	Hemoglobin subunit beta;Spinorphin	P02070;CON__P02070
+	Bos taurus	Profilin-1	P02584;CON__P02584
+	Bos taurus	Fibrinogen alpha chain;Fibrinopeptide A	P02672;CON__P02672
+	Bos taurus	Fibrinogen beta chain;Fibrinopeptide B	P02676;CON__P02676
+	Bos taurus	Serum albumin	P02769;CON__P02769
+	Homo sapiens;Mus musculus	Keratin, type II cuticular Hb4;Keratin, type II cytoskeletal 7;Keratin, type II cytoskeletal 8	CON__Q9DCV7;Q3KNV1;CON__Q3KNV1;CON__P08729;CON__P05787;Q9DCV7;P08729;P05787;Q9H552;CON__Q9H552;CON__Q9NSB2;CON__Q6ISB0;Q9NSB2;Q6ISB0
+	Bos taurus	Activation peptide;Plasmin heavy chain A;Plasmin heavy chain A, short form;Plasmin light chain B;Plasminogen	P06868;CON__P06868
+	Bos taurus	Alpha-2-HS-glycoprotein	P12763;CON__P12763
+	Bos taurus	Apolipoprotein A-I;Proapolipoprotein A-I;Truncated apolipoprotein A-I	P15497;CON__P15497
+	Bos taurus	Clusterin;Clusterin alpha chain;Clusterin beta chain	P17697;CON__P17697
+	Bos taurus	Thymosin beta-10;Thymosin beta-8	P21752;CON__P21752
+	Bos taurus	Alpha-2-antiplasmin	P28800;CON__P28800
+	Bos taurus	Alpha-1-antiproteinase	P34955;CON__P34955
+	Homo sapiens	Keratin, type I cytoskeletal 9	CON__P35527;P35527
+	Bos taurus	Antithrombin-III	P41361;CON__P41361
+	Bos taurus	Metallothionein-1A	P67983;CON__P67983
+	Bos taurus	Apolipoprotein A-II;Proapolipoprotein A-II;Truncated apolipoprotein A-II	P81644;CON__P81644
+	Bos taurus	Apolipoprotein E	Q03247;CON__Q03247
+	Bos taurus	Lumican	Q05443;CON__Q05443
+	Bos taurus		Q05B55;CON__Q05B55
+	Bos taurus	Serotransferrin	Q29443;CON__Q29443;Q0IIK2;CON__Q0IIK2
+	Bos taurus	Inter-alpha-trypsin inhibitor heavy chain H3	Q0V8M9;CON__Q0V8M9
+	Bos taurus		Q1A7A4;CON__Q1A7A4
+			Q1RMK2;CON__Q1RMK2
+	Bos taurus		Q1RMN8;CON__Q1RMN8
+	Bos taurus	C4b-binding protein alpha chain	Q28065;CON__Q28065
+	Bos taurus	Coagulation factor V;Coagulation factor V heavy chain;Coagulation factor V light chain	Q28107;CON__Q28107
+	Bos taurus		Q28194;CON__Q28194
+	Bos taurus	Complement component C7	Q29RQ1;CON__Q29RQ1
+	Bos taurus		Q2KIF2;CON__Q2KIF2
+	Bos taurus	Protein HP-25 homolog 2	Q2KIU3;CON__Q2KIU3
+	Bos taurus	Alpha-1B-glycoprotein	Q2KJF1;CON__Q2KJF1
+	Bos taurus	Acylation stimulating protein;C3a anaphylatoxin;C3-beta-c;Complement C3;Complement C3 alpha chain;Complement C3 beta chain;Complement C3b alpha' chain;Complement C3c alpha' chain fragment 1;Complement C3c alpha' chain fragment 2;Complement C3d fragment;Complement C3dg fragment;Complement C3f fragment;Complement C3g fragment	Q2UVX4;CON__Q2UVX4
+	Bos taurus		Q3KUS7;CON__Q3KUS7
+	Bos taurus	Alpha-amylase	Q3MHH8;CON__Q3MHH8
+	Bos taurus	Hemoglobin fetal subunit beta	Q3SX09;CON__Q3SX09
+	Bos taurus	Gelsolin	Q3SX14;CON__Q3SX14
+	Bos taurus	Tropomyosin beta chain	Q3SX28;CON__Q3SX28
+	Bos taurus	Alpha-fetoprotein	Q3SZ57;CON__Q3SZ57
+	Bos taurus		Q3SZH5;CON__Q3SZH5
+	Bos taurus	Inter-alpha-trypsin inhibitor heavy chain H4	Q3T052;CON__Q3T052
+	Bos taurus	Glucose-6-phosphate isomerase	Q3ZBD7;CON__Q3ZBD7
+	Bos taurus		Q3ZBS7;CON__Q3ZBS7
+	Bos taurus	Fetuin-B	Q58D62;CON__Q58D62
+	Homo sapiens	Keratin, type II cytoskeletal 1b	CON__Q7Z794;Q7Z794
+	Bos taurus	Pigment epithelium-derived factor	Q95121;CON__Q95121
+	Mus musculus	Keratin, type I cytoskeletal 20	CON__Q9D312;Q9D312
+	Homo sapiens;Mus musculus	Keratin, type II cytoskeletal 71;Keratin, type II cytoskeletal 72;Keratin, type II cytoskeletal 74	CON__Q9R0H5;Q9R0H5;REFSEQ:XP_092267;CON__REFSEQ:XP_092267;Q14CN4-1;CON__Q14CN4-1;CON__Q6IME9;CON__Q3SY84;CON__Q7RTS7;Q6IME9;Q3SY84;Q7RTS7
+	Bos taurus		Q9TRI1;CON__Q9TRI1
